# Supplementary material
Source: HighWire-hosted journal article supplement (https://bmjopen.bmj.com/content/9/3/e026744)
Supplement: inline-supplementary-material-1 [file inline-supplementary-material-1.pdf]

| Required<br>Field<br>(please X) | Variable                   | Variable Label                    | Values   | Value Label   | comment |
|---------------------------------|----------------------------|-----------------------------------|----------|---------------|---------|
|                                 | participant_id             | unique participant id for linkage |          |               |         |
|                                 | nhs_number                 |                                   |          |               |         |
|                                 | registration_date          | date of upload to database        |          |               |         |
|                                 | surname                    |                                   |          |               |         |
|                                 | forenames                  |                                   |          |               |         |
|                                 | title                      |                                   |          |               |         |
|                                 | address_l1                 |                                   |          |               |         |
|                                 | address_l2                 |                                   |          |               |         |
|                                 | address_l3                 |                                   |          |               |         |
|                                 | address_l4                 |                                   |          |               |         |
|                                 | address_l5                 |                                   |          |               |         |
|                                 | postcode                   |                                   |          |               |         |
|                                 | home_telephone             |                                   |          |               |         |
|                                 | work_telephone             |                                   |          |               |         |
|                                 | mobile_telephone           |                                   |          |               |         |
|                                 |                            |                                   |          |               |         |
|                                 | SixMonthFollowUpPreference | how the participant wo            | 1        | face to face  |         |
|                                 |                            |                                   | 2        | on-line       |         |
|                                 |                            |                                   | 3        | telephone     |         |
|                                 |                            |                                   | 9        | no preference |         |
|                                 |                            |                                   |          |               |         |
|                                 | EmailAddress               |                                   | verabtim |               |         |

| Required<br>Field (please<br>X) | Variable                         | Variable Label                                        | Values                | Value Labels                          | comment |  |
|---------------------------------|----------------------------------|-------------------------------------------------------|-----------------------|---------------------------------------|---------|--|
|                                 | participantid                    | unique identification number                          | 100000+               |                                       |         |  |
|                                 |                                  |                                                       |                       |                                       |         |  |
|                                 | Site                             | unique site number                                    | Null                  | Bradford Leeds                        |         |  |
|                                 |                                  |                                                       |                       |                                       |         |  |
|                                 | NHSNumber                        | NHS assigned number                                   | verbatim              |                                       |         |  |
|                                 |                                  |                                                       |                       |                                       |         |  |
|                                 | surname                          | participant surname                                   | verbatim              |                                       |         |  |
|                                 |                                  |                                                       |                       |                                       |         |  |
|                                 | forenames                        | participant forenames                                 | verbatim              |                                       |         |  |
|                                 |                                  |                                                       |                       |                                       |         |  |
|                                 | gp_code                          | participant's general practice                        | verbatim              |                                       |         |  |
|                                 |                                  |                                                       |                       |                                       |         |  |
|                                 | status                           | study status of participant                           |                       | 0 Not contacted                       |         |  |
|                                 |                                  |                                                       |                       | 1 Attempt contact again               |         |  |
|                                 |                                  |                                                       |                       | 2 Consent visit                       |         |  |
|                                 |                                  |                                                       |                       | 99 OOS                                |         |  |
|                                 |                                  |                                                       |                       | 100 Baseline stage, Visit {0}         |         |  |
|                                 |                                  |                                                       |                       | 101 Baseline stage, COMPLETE          |         |  |
|                                 |                                  |                                                       |                       | 200 6 month stage, Visit {0}          |         |  |
|                                 |                                  |                                                       |                       | 201 6 month stage, COMPLETE           |         |  |
|                                 |                                  |                                                       |                       | 300 12 month stage, Visit {0}         |         |  |
|                                 |                                  |                                                       |                       | 301 12 month stage, COMPLETE          |         |  |
|                                 |                                  |                                                       |                       | 400 24 month stage, Visit {0}         |         |  |
|                                 |                                  |                                                       |                       | 401 24 month stage, COMPLETE          |         |  |
|                                 |                                  |                                                       |                       | 500 48 month stage, Visit {0}         |         |  |
|                                 |                                  |                                                       |                       | 501 48 month stage, COMPLETE          |         |  |
|                                 |                                  |                                                       |                       | 600 Post 48 month stage, Visit {0}    |         |  |
|                                 |                                  |                                                       |                       | 601 Post 48 month stage, COMPLETE     |         |  |
|                                 |                                  |                                                       |                       | 999 OOS                               |         |  |
|                                 |                                  |                                                       |                       |                                       |         |  |
|                                 | StartOfStageDate                 | date and time that data is changed entered in new     | yyyy-mm-dd / hh/mm/ss |                                       |         |  |
|                                 |                                  |                                                       |                       |                                       |         |  |
|                                 |                                  |                                                       |                       |                                       |         |  |
|                                 | dob                              | participant's date of birth                           | yyyy/mm/dd            | <input type="text"/>                  |         |  |
|                                 |                                  |                                                       |                       |                                       |         |  |
|                                 | date_of_death                    | participant's date of death                           | yyyy/mm/dd            |                                       |         |  |
|                                 |                                  |                                                       |                       |                                       |         |  |
|                                 |                                  |                                                       |                       |                                       |         |  |
|                                 | sex                              | participant's gender                                  |                       | 1 male                                |         |  |
|                                 |                                  |                                                       |                       | 2 female                              |         |  |
|                                 |                                  |                                                       |                       |                                       |         |  |
|                                 |                                  |                                                       |                       |                                       |         |  |
|                                 | ethnicity                        | participant's ethnic origin                           |                       | 1 white                               |         |  |
|                                 |                                  |                                                       |                       | 2 mixed white /black caribbean        |         |  |
|                                 |                                  |                                                       |                       | 3 mixed white / asian                 |         |  |
|                                 |                                  |                                                       |                       | 4 mixed white / black african         |         |  |
|                                 |                                  |                                                       |                       | 5 other mixed                         |         |  |
|                                 |                                  |                                                       |                       | 6 black african                       |         |  |
|                                 |                                  |                                                       |                       | 7 asian indian                        |         |  |
|                                 |                                  |                                                       |                       | 8 asian bangladeshi                   |         |  |
|                                 |                                  |                                                       |                       | 9 asian pakistani                     |         |  |
|                                 |                                  |                                                       |                       | 10 other asian                        |         |  |
|                                 |                                  |                                                       |                       | 11 black caribbean                    |         |  |
|                                 |                                  |                                                       |                       | 12 other black                        |         |  |
|                                 |                                  |                                                       |                       | 13 chinese                            |         |  |
|                                 |                                  |                                                       |                       | 14 other                              |         |  |
|                                 |                                  |                                                       |                       |                                       |         |  |
|                                 | Otherethnicity                   |                                                       | verbatim              |                                       |         |  |
|                                 |                                  |                                                       |                       |                                       |         |  |
|                                 | MaritalStatus                    | participant's martial status                          |                       | 1 Single, that is never married       |         |  |
|                                 |                                  |                                                       |                       | 2 Married                             |         |  |
|                                 |                                  |                                                       |                       | 3 Remarried                           |         |  |
|                                 |                                  |                                                       |                       | 4 Separated but still legally married |         |  |
|                                 |                                  |                                                       |                       | 5 Divorced                            |         |  |
|                                 |                                  |                                                       |                       | 6 Widowed                             |         |  |
|                                 |                                  |                                                       | 97/98/99              | missing                               |         |  |
|                                 |                                  |                                                       |                       |                                       |         |  |
|                                 |                                  |                                                       |                       |                                       |         |  |
|                                 | FutureStudies_ParticipantConsent | interest in taking part in future studies             |                       | 1 Yes                                 |         |  |
|                                 |                                  |                                                       |                       | 2 No                                  |         |  |
|                                 |                                  |                                                       | 97/98/99              | missing                               |         |  |
|                                 |                                  |                                                       |                       | 2 no                                  |         |  |
|                                 |                                  |                                                       | 97/98/99              | missing                               |         |  |
|                                 |                                  |                                                       |                       |                                       |         |  |
|                                 | otherStudies                     | are you currently participating in any other research |                       | 1 yes                                 |         |  |
|                                 |                                  |                                                       |                       | 2 no                                  |         |  |
|                                 |                                  |                                                       | 97/98/99              | missing                               |         |  |
|                                 |                                  |                                                       |                       |                                       |         |  |
|                                 | otherStudiesYes                  | details of other studies                              | verbatim              |                                       |         |  |

| Required Field (please X)                 | Variable                              | Variable Label                                      | Values   | Value Label comment                         |                                 |  |  |
|-------------------------------------------|---------------------------------------|-----------------------------------------------------|----------|---------------------------------------------|---------------------------------|--|--|
|                                           | HouseType                             | housing type                                        |          | 1 Bungalow                                  |                                 |  |  |
|                                           |                                       |                                                     |          | 2 Semi-detached house                       |                                 |  |  |
|                                           |                                       |                                                     |          | 3 Detached house                            |                                 |  |  |
|                                           |                                       |                                                     |          | 4 Terraced house                            |                                 |  |  |
|                                           |                                       |                                                     |          | 5 Flat (which floor)                        |                                 |  |  |
|                                           |                                       |                                                     |          | 6 Sheltered housing (which floor)           |                                 |  |  |
|                                           |                                       |                                                     |          | 7 Extra care housing                        |                                 |  |  |
|                                           |                                       |                                                     |          | 8 Care home (residential)                   |                                 |  |  |
|                                           |                                       |                                                     |          | 9 Care home (nursing)                       |                                 |  |  |
|                                           |                                       |                                                     | 97/98/99 | Missing                                     |                                 |  |  |
|                                           | Temp                                  | temperature in c of the room                        | verbatim |                                             |                                 |  |  |
|                                           |                                       |                                                     |          |                                             |                                 |  |  |
|                                           | OtherRoomTemp                         | are all your rooms a similar temperature            |          | 1 yes                                       |                                 |  |  |
|                                           |                                       |                                                     |          | 2 no                                        |                                 |  |  |
|                                           |                                       |                                                     | 97/98/99 | missing                                     |                                 |  |  |
|                                           |                                       |                                                     |          |                                             |                                 |  |  |
|                                           | WhyNotRoomsSimilarTemp                | reason for temperature difference                   | verbatim |                                             |                                 |  |  |
|                                           |                                       |                                                     |          |                                             |                                 |  |  |
|                                           | LivingCircumstances                   | participant's living circumstances                  |          | 1 lives alone                               |                                 |  |  |
|                                           |                                       |                                                     |          | 2 lives with partner/spouse                 |                                 |  |  |
|                                           |                                       |                                                     |          | 3 lives with family                         |                                 |  |  |
|                                           |                                       |                                                     |          | 4 lives with a friend                       |                                 |  |  |
|                                           |                                       |                                                     |          | 5 lives with other residents of a care home |                                 |  |  |
|                                           |                                       |                                                     | 97/98/99 | missing                                     |                                 |  |  |
|                                           |                                       |                                                     |          |                                             |                                 |  |  |
|                                           | OwnHome                               | Participant/husband/wife owns home                  |          | 1 Yes                                       |                                 |  |  |
|                                           |                                       |                                                     |          | 2 No                                        |                                 |  |  |
|                                           |                                       |                                                     | 97/98/99 | missing                                     |                                 |  |  |
|                                           |                                       |                                                     |          |                                             |                                 |  |  |
|                                           | HowLongAtCurrentAddress               | How long lived at current address                   | Verbatim |                                             |                                 |  |  |
|                                           |                                       |                                                     |          |                                             |                                 |  |  |
|                                           | GoOutAloneInDay                       | Go out alone in day                                 |          | 1 Yes                                       |                                 |  |  |
|                                           |                                       |                                                     |          | 2 No                                        |                                 |  |  |
|                                           |                                       |                                                     | 97/98/99 | missing                                     |                                 |  |  |
|                                           |                                       |                                                     |          |                                             |                                 |  |  |
|                                           | GoOutAloneInNight                     | Go out alone in night                               |          | 1 Yes                                       |                                 |  |  |
|                                           |                                       |                                                     |          | 2 No                                        |                                 |  |  |
|                                           |                                       |                                                     | 97/98/99 | missing                                     |                                 |  |  |
|                                           |                                       |                                                     |          |                                             |                                 |  |  |
|                                           | HowSafeDoYouFeelDuringDay             | How safe (would) feel walking alone in day          |          | 1 Very safe                                 | NB this area=within 15 min walk |  |  |
|                                           |                                       |                                                     |          | 2 Fairly safe                               |                                 |  |  |
|                                           |                                       |                                                     |          | 3 A bit unsafe                              |                                 |  |  |
|                                           |                                       |                                                     |          | 4 Very unsafe                               |                                 |  |  |
|                                           |                                       |                                                     | 97/98/99 | missing                                     |                                 |  |  |
|                                           |                                       |                                                     |          |                                             |                                 |  |  |
|                                           | HowSafeDoYouFeelDuringNight           | How safe (would) feel walking alone at night        |          | 1 Very safe                                 | NB this area=within 15 min walk |  |  |
|                                           |                                       |                                                     |          | 2 Fairly safe                               |                                 |  |  |
|                                           |                                       |                                                     |          | 3 A bit unsafe                              |                                 |  |  |
|                                           |                                       |                                                     |          | 4 Very unsafe                               |                                 |  |  |
|                                           |                                       |                                                     | 97/98/99 | missing                                     |                                 |  |  |
| Yes value as follows as adjacent question |                                       |                                                     |          |                                             |                                 |  |  |
| 1                                         | ConcernsGettingOutNone                | What concerns, if any, stop you getting out & about |          |                                             |                                 |  |  |
| 2                                         | ConcernsGettingOutTraffic             |                                                     |          |                                             |                                 |  |  |
| 3                                         | ConcernsGettingOutAntiSocialBehaviour |                                                     | 97/98/99 | missing                                     |                                 |  |  |
| 4                                         | ConcernsGettingOutFalling             |                                                     |          |                                             |                                 |  |  |
| 5                                         | ConcernsGettingOutCrime               |                                                     |          |                                             |                                 |  |  |
| 6                                         | ConcernsGettingOutOther               |                                                     |          |                                             |                                 |  |  |
|                                           | ConcernsGettingOutOtherDetails        |                                                     | Verbatim |                                             |                                 |  |  |
|                                           |                                       |                                                     |          |                                             |                                 |  |  |
|                                           | HowSafeDoYouFeelCrossingRoads         | How safe feel crossing roads                        |          | 1 Very safe                                 |                                 |  |  |
|                                           |                                       |                                                     |          | 2 Fairly safe                               |                                 |  |  |
|                                           |                                       |                                                     |          | 3 A bit unsafe                              |                                 |  |  |
|                                           |                                       |                                                     |          | 4 Very unsafe                               |                                 |  |  |
|                                           |                                       |                                                     | 97/98/99 | missing                                     |                                 |  |  |
|                                           |                                       |                                                     |          |                                             |                                 |  |  |
|                                           | HowWorriedAboutBeingVictimOfCrime     | How worried about being victim of crime             |          | 1 Very                                      |                                 |  |  |
|                                           |                                       |                                                     |          | 2 Fairly                                    |                                 |  |  |
|                                           |                                       |                                                     |          | 3 Not very                                  |                                 |  |  |
|                                           |                                       |                                                     |          | 4 Not at all                                |                                 |  |  |
|                                           |                                       |                                                     | 97/98/99 |                                             |                                 |  |  |

| Required<br>Field (please<br>X) |                |                                                                     |          |                   |         |
|---------------------------------|----------------|---------------------------------------------------------------------|----------|-------------------|---------|
|                                 | Variable       | Variable Label                                                      | Values   | Value Label       | comment |
|                                 | ageEducation   | how old were you when you finished full time continuous education ' | number   |                   |         |
|                                 |                |                                                                     |          |                   |         |
|                                 | PaidWork       | what was the last paid work that you did?'                          | number   |                   |         |
|                                 |                |                                                                     |          |                   |         |
|                                 | Qualifications | what was the highest educational qualification you attained?'       | 1        | GCSE              |         |
|                                 |                |                                                                     | 2        | HNS/HND           |         |
|                                 |                |                                                                     | 3        | diploma           |         |
|                                 |                |                                                                     | 4        | AS and A level    |         |
|                                 |                |                                                                     | 5        | bachelor's degree |         |
|                                 |                |                                                                     | 6        | postgraduate      |         |
|                                 |                |                                                                     | 7        | no qualifications |         |
|                                 |                |                                                                     | 97/98/99 | missing           |         |
|                                 |                |                                                                     |          |                   |         |
|                                 |                |                                                                     |          |                   |         |
|                                 | VoluntaryWork  | do you currently do any voluntary work?'                            | 1        | yes               |         |
|                                 |                |                                                                     | 2        | no                |         |
|                                 |                |                                                                     | 97/98/99 | missing           |         |

| Required<br>Field (please<br>X) | Variable                 | Variable Label         | Values   | Value Label | comment |
|---------------------------------|--------------------------|------------------------|----------|-------------|---------|
|                                 | HaveBrothers             | did/do you have any... | number   |             |         |
|                                 | HaveSisters              | did/do you have any... | 97/98/99 | missing     |         |
|                                 | HaveSons                 | did/do you have any... |          |             |         |
|                                 | HaveDaughters            | did/do you have any... |          |             |         |
|                                 | HaveGrandsons            | did/do you have any... |          |             |         |
|                                 | HaveGranddaughters       | did/do you have any... |          |             |         |
|                                 |                          |                        |          |             |         |
|                                 | BrotherFirstName         | did/do you have any... | verbatim |             |         |
|                                 | SisterFirstName          | did/do you have any... |          |             |         |
|                                 | SonFirstName             | did/do you have any... |          |             |         |
|                                 | DaughterFirstName        | did/do you have any... |          |             |         |
|                                 | GrandsonFirstName        | did/do you have any... |          |             |         |
|                                 | GraddaughterFirstName    | did/do you have any... |          |             |         |
|                                 |                          |                        |          |             |         |
|                                 | BrotherAliveorDead       | did/do you have any... | 1        | alive       |         |
|                                 | SisterAliveorDead        | did/do you have any... | 2        | dead        |         |
|                                 | SonAliveorDead           | did/do you have any... | 97/98/99 | missing     |         |
|                                 | DaughterAliveorDead      | did/do you have any... |          |             |         |
|                                 | GrandsonAliveorDead      | did/do you have any... |          |             |         |
|                                 | GranddaughterAliveorDead | did/do you have any... |          |             |         |

| Required Field<br>(please X) | Variable | Variable Label                                             | Values                                                                                                           | Value Label | comment                  |  |  |
|------------------------------|----------|------------------------------------------------------------|------------------------------------------------------------------------------------------------------------------|-------------|--------------------------|--|--|
|                              |          | InformalSupportLift                                        | If you needed a lift to somewhere urgently, could you ask someone for help?'                                     | 1           | Yes                      |  |  |
|                              |          | InformalSupportIll                                         | If you wer ill in bed and needed help at home, could you ask someone for help?'                                  | 2           | No                       |  |  |
|                              |          |                                                            |                                                                                                                  |             |                          |  |  |
|                              |          |                                                            |                                                                                                                  | 97/98/99    | Missing                  |  |  |
|                              |          | informal SupportCrisisNumberof PeopleforSupport            | If you had a serious personal crisis, how many people could you turn to for comfort and support?'                | number      |                          |  |  |
|                              |          |                                                            |                                                                                                                  | 97/98/99    | Missing                  |  |  |
|                              |          | informalSupportPeopleLiveClose                             | How many of these people live within a 15-20 minute drive, if any?'                                              | number      |                          |  |  |
|                              |          |                                                            |                                                                                                                  | 97/98/99    | Missing                  |  |  |
|                              |          | InformalSupportBrother                                     | Can you tellme the people to whom you could turn to for help (you can choose more than one)?'                    | 1           | yes                      |  |  |
|                              |          | InformalSupportSister                                      |                                                                                                                  | 2           | no                       |  |  |
|                              |          | InformalSupportDaughter                                    |                                                                                                                  | 97/98/99    | missing                  |  |  |
|                              |          | InformalSupportSon                                         |                                                                                                                  |             |                          |  |  |
|                              |          | InformalSupportGranddaughter                               |                                                                                                                  |             |                          |  |  |
|                              |          | InformalSupportGrandson                                    |                                                                                                                  |             |                          |  |  |
|                              |          | InformalSupportFriend                                      |                                                                                                                  |             |                          |  |  |
|                              |          | InformalSupportNeighbour                                   |                                                                                                                  |             |                          |  |  |
|                              |          | InformalSupportOther                                       |                                                                                                                  | verbatim    |                          |  |  |
|                              |          |                                                            |                                                                                                                  |             |                          |  |  |
|                              |          | informalSupportLastFourWeeks                               | approximately how many hours of informal suport have you had in the last four weeks? (unpaid)                    | number      |                          |  |  |
|                              |          |                                                            |                                                                                                                  | 97/98/99    | Missing                  |  |  |
|                              |          |                                                            |                                                                                                                  |             |                          |  |  |
|                              |          | ServicesVisitWarden_ServicesVisitsFrequency                | In the last 4 weeks, have you seen or had a visit from, or to, any of the following services? If so, how often?' | 1           | Several times a day      |  |  |
|                              |          | ServicesVisitHomecare_ServicesVisitsFrequency              |                                                                                                                  | 2           | Once a day               |  |  |
|                              |          | ServicesVisitNightattendantsitter_ServicesVisitsFrequency  |                                                                                                                  | 3           | One or more times a week |  |  |
|                              |          | ServicesVisitDaysitter_ServicesVisitsFrequency             |                                                                                                                  | 4           | Less than once a week    |  |  |
|                              |          | ServicesVisitMealsProvision_ServicesVisitsFrequency        |                                                                                                                  | 5           | No contact               |  |  |
|                              |          | ServicesVisitCommunityNurse_ServicesVisitsFrequency        |                                                                                                                  | 6           | Don't know               |  |  |
|                              |          | ServicesVisitPhysiotherapist_ServicesVisitsFrequency       |                                                                                                                  | 7           | Not applicable           |  |  |
|                              |          | ServicesVisitOccupationalTherapist_ServicesVisitsFrequency |                                                                                                                  | 97/98/99    | Missing                  |  |  |
|                              |          | ServicesVisitChiropodist_ServicesVisitsFrequency           |                                                                                                                  |             |                          |  |  |
|                              |          | ServicesVisitSpeachTherapist_ServicesVisitsFrequency       |                                                                                                                  |             |                          |  |  |
|                              |          | ServicesVisitDietician_ServicesVisitsFrequency             |                                                                                                                  |             |                          |  |  |
|                              |          | ServicesVisitSocialWorker_ServicesVisitsFrequency          |                                                                                                                  |             |                          |  |  |
|                              |          |                                                            |                                                                                                                  |             |                          |  |  |
|                              |          | FormalSupportLastFourWeeks                                 | Approximately how many hours of formal support have you had in the last four weeks?'                             | number      |                          |  |  |
|                              |          |                                                            |                                                                                                                  | 97/98/99    | Missing                  |  |  |
|                              |          |                                                            |                                                                                                                  |             |                          |  |  |
|                              |          | GPVisit                                                    | In the last 4 weeks have you been to see or had a visit from a GP?'                                              | 1           | Yes                      |  |  |
|                              |          | OutpatientClinic                                           | In the last 4 weeks have you attended an outpatients clinic?'                                                    | 2           | No                       |  |  |
|                              |          |                                                            |                                                                                                                  | 97/98/99    | Missing                  |  |  |
|                              |          |                                                            |                                                                                                                  |             |                          |  |  |
|                              |          | GPVisitHowOften                                            | number of visits                                                                                                 | number      |                          |  |  |
|                              |          | OutpatientClinicHowOften                                   | number of visits                                                                                                 | number      |                          |  |  |
|                              |          |                                                            |                                                                                                                  | 97/98/99    | Missing                  |  |  |
|                              |          |                                                            |                                                                                                                  |             |                          |  |  |
|                              |          | AidAtHomeGrabRails                                         | Do you use any of the following adi/adaptations to help you at home (>1)                                         | 1           | yes                      |  |  |
|                              |          | AidAtHomeToiletSeat                                        |                                                                                                                  | 2           | yes                      |  |  |
|                              |          | AidAtHomeBathSeat                                          |                                                                                                                  | 3           | yes                      |  |  |
|                              |          | AidAtHomeReclinerChair                                     |                                                                                                                  | 4           | yes                      |  |  |
|                              |          | AidAtHomeBedRail                                           |                                                                                                                  | 5           | yes                      |  |  |
|                              |          | AidAtHomeBedRisers                                         |                                                                                                                  | 6           | yes                      |  |  |
|                              |          | AidAtHomeHoist                                             |                                                                                                                  | 7           | yes                      |  |  |
|                              |          | AidAtHomeHelpingHand                                       |                                                                                                                  | 8           | yes                      |  |  |
|                              |          | AidAtHomeKeySafe                                           |                                                                                                                  | 9           | yes                      |  |  |
|                              |          | AidAtHomePendantAlarm                                      |                                                                                                                  | 10          | yes                      |  |  |
|                              |          | AidAtHomeStairLift                                         |                                                                                                                  | 11          | yes                      |  |  |
|                              |          | AidAtHomeOutsideStep                                       |                                                                                                                  | 12          | yes                      |  |  |
|                              |          | AidAtHomeWheelchair                                        |                                                                                                                  | 13          | yes                      |  |  |
|                              |          |                                                            |                                                                                                                  | 0           | no                       |  |  |
|                              |          |                                                            |                                                                                                                  | 97/98/99    | Missing                  |  |  |
|                              |          |                                                            |                                                                                                                  |             |                          |  |  |
|                              |          |                                                            |                                                                                                                  |             |                          |  |  |
|                              |          |                                                            |                                                                                                                  |             |                          |  |  |
|                              |          |                                                            |                                                                                                                  |             |                          |  |  |
|                              |          |                                                            |                                                                                                                  |             |                          |  |  |

| Required Field (please X) | Variable                | Variable Label                                                                        | Values   | Value Label                      | comment |  |  |
|---------------------------|-------------------------|---------------------------------------------------------------------------------------|----------|----------------------------------|---------|--|--|
|                           | Smoker                  | Have you ever smoked (this can include cigarettes, roll-ups, piopes or cigars)?       |          |                                  |         |  |  |
|                           |                         |                                                                                       | 1        | Yes                              |         |  |  |
|                           |                         |                                                                                       | 2        | No                               |         |  |  |
|                           |                         |                                                                                       | 97/98/99 | Missing                          |         |  |  |
|                           |                         |                                                                                       |          |                                  |         |  |  |
|                           | SmokeRecently           | Do you smoke at all nowadays'?                                                        |          |                                  |         |  |  |
|                           |                         |                                                                                       | 1        | Yes                              |         |  |  |
|                           |                         |                                                                                       | 2        | No                               |         |  |  |
|                           |                         |                                                                                       | 97/98/99 | Missing                          |         |  |  |
|                           |                         |                                                                                       |          |                                  |         |  |  |
|                           | HowManyCigarettes       | How many cigarettes as day do you                                                     | number   |                                  |         |  |  |
|                           |                         |                                                                                       | 97/98/99 | Missing                          |         |  |  |
|                           |                         |                                                                                       |          |                                  |         |  |  |
|                           | HowMnayRollUpsOrPipes   | If you smoke, or have smoked, ro                                                      | number   |                                  |         |  |  |
|                           |                         |                                                                                       | 97/98/99 | Missing                          |         |  |  |
|                           |                         |                                                                                       |          |                                  |         |  |  |
|                           | HowManyYears            | Approximately how mnay years h                                                        | number   |                                  |         |  |  |
|                           |                         |                                                                                       | 97/98/99 | Missing                          |         |  |  |
|                           |                         |                                                                                       |          |                                  |         |  |  |
|                           | CALC_CigarettePackYears | Lifetime exposure                                                                     |          |                                  |         |  |  |
|                           |                         |                                                                                       | number   |                                  |         |  |  |
|                           |                         |                                                                                       | 97/98/99 | Missing                          |         |  |  |
|                           |                         |                                                                                       |          |                                  |         |  |  |
|                           | CALC_TobaccoPackYears   | Lifetime exposure                                                                     |          |                                  |         |  |  |
|                           |                         |                                                                                       | number   |                                  |         |  |  |
|                           |                         |                                                                                       | 97/98/99 | Missing                          |         |  |  |
|                           |                         |                                                                                       |          |                                  |         |  |  |
|                           | drinkAlcohol            | Do you ever drink alcohol incuding drinks you brew at home?'                          |          |                                  |         |  |  |
|                           |                         |                                                                                       | 1        | Yes                              |         |  |  |
|                           |                         |                                                                                       | 2        | No                               |         |  |  |
|                           |                         |                                                                                       | 97/98/99 | Missing                          |         |  |  |
|                           |                         |                                                                                       |          |                                  |         |  |  |
|                           | AlcoholLast12Months     | ...how often have you had na alcoholaic drink of any kind during the last 12 months?' |          |                                  |         |  |  |
|                           |                         |                                                                                       | 1        | almost every day                 |         |  |  |
|                           |                         |                                                                                       | 2        | five or 6 days a week            |         |  |  |
|                           |                         |                                                                                       | 3        | three or four days a week        |         |  |  |
|                           |                         |                                                                                       | 4        | once or twice a week             |         |  |  |
|                           |                         |                                                                                       | 5        | once or twice a month            |         |  |  |
|                           |                         |                                                                                       | 6        | once every couple of months      |         |  |  |
|                           |                         |                                                                                       | 7        | once or twice a year             |         |  |  |
|                           |                         |                                                                                       | 8        | not at all in the last 12 months |         |  |  |
|                           |                         |                                                                                       | 9        | unsure                           |         |  |  |
|                           |                         |                                                                                       | 97/98/99 | Missing                          |         |  |  |
|                           |                         |                                                                                       |          |                                  |         |  |  |
|                           | AlcoholLast7Days        | how many days out of the last 7                                                       | number   |                                  |         |  |  |
|                           |                         |                                                                                       | 97/98/99 | Missing                          |         |  |  |
|                           |                         |                                                                                       |          |                                  |         |  |  |
|                           | smallGlassOfWine        | Thinking about the last 7 days, h                                                     | number   |                                  |         |  |  |
|                           | standardGlassOfWine     |                                                                                       | 97/98/99 | Missing                          |         |  |  |
|                           | LargeGlassOfWine        |                                                                                       |          |                                  |         |  |  |
|                           | lowerStrengthBeer       |                                                                                       |          |                                  |         |  |  |
|                           | botlleOfBeer            |                                                                                       |          |                                  |         |  |  |
|                           | canOfBeer               |                                                                                       |          |                                  |         |  |  |
|                           | Alcopop                 |                                                                                       |          |                                  |         |  |  |
|                           | SingleSpirit            |                                                                                       |          |                                  |         |  |  |



| Required Field (please X) | Variable                            | Variable Label                                                              | Values   | Value Label               | comment |  |
|---------------------------|-------------------------------------|-----------------------------------------------------------------------------|----------|---------------------------|---------|--|
|                           | HearingAid                          | Do you have a hearing aid?'                                                 |          |                           |         |  |
|                           |                                     |                                                                             | 1        | Yes                       |         |  |
|                           |                                     |                                                                             | 2        | No                        |         |  |
|                           |                                     |                                                                             | 3        | Don't know                |         |  |
|                           |                                     |                                                                             | 97/98/99 | Missing                   |         |  |
|                           |                                     |                                                                             |          |                           |         |  |
|                           | HearingAidUsage                     | How often do you use a hearing aid?'                                        |          |                           |         |  |
|                           |                                     |                                                                             | 1        | Always                    |         |  |
|                           |                                     |                                                                             | 2        | Regularly                 |         |  |
|                           |                                     |                                                                             | 3        | Only on special occasions |         |  |
|                           |                                     |                                                                             | 4        | Never                     |         |  |
|                           |                                     |                                                                             | 97/98/99 | Missing                   |         |  |
|                           |                                     |                                                                             |          |                           |         |  |
|                           | HearingTest                         | Have you had a hearing test in the last year?'                              |          |                           |         |  |
|                           |                                     |                                                                             | 1        | Yes                       |         |  |
|                           |                                     |                                                                             | 2        | No                        |         |  |
|                           |                                     |                                                                             | 3        | Don't know                |         |  |
|                           |                                     |                                                                             | 97/98/99 | Missing                   |         |  |
|                           |                                     |                                                                             |          |                           |         |  |
|                           | DifficultyHearing                   | Interviewer's assessment of participant's difficulty hearing so far         |          |                           |         |  |
|                           |                                     |                                                                             | 1        | No difficulty             |         |  |
|                           |                                     |                                                                             | 2        | Some difficulty           |         |  |
|                           |                                     |                                                                             | 3        | Unable to hear at all     |         |  |
|                           |                                     |                                                                             | 97/98/99 | Missing                   |         |  |
|                           |                                     |                                                                             |          |                           |         |  |
|                           | HearingInQuietRoom                  | Do you have difficulty hearing someone in a quiet room?'                    |          |                           |         |  |
|                           |                                     |                                                                             | 1        | Yes                       |         |  |
|                           |                                     |                                                                             | 2        | No                        |         |  |
|                           |                                     |                                                                             | 3        | Don't know                |         |  |
|                           |                                     |                                                                             | 97/98/99 | Missing                   |         |  |
|                           |                                     |                                                                             |          |                           |         |  |
|                           | HearingInLoudRoom                   | Do you find it difficult to follow a conversation in a noisy room?'         |          |                           |         |  |
|                           |                                     |                                                                             | 1        | Yes                       |         |  |
|                           |                                     |                                                                             | 2        | No                        |         |  |
|                           |                                     |                                                                             | 3        | Don't know                |         |  |
|                           |                                     |                                                                             | 97/98/99 | Missing                   |         |  |
|                           |                                     |                                                                             |          |                           |         |  |
|                           | WhisperTestResult                   | Whisper hearing test result                                                 |          |                           |         |  |
|                           |                                     |                                                                             | 1        | Pass                      |         |  |
|                           |                                     |                                                                             | 2        | Fail                      |         |  |
|                           |                                     |                                                                             | 97/98/99 | Missing                   |         |  |
|                           |                                     |                                                                             |          |                           |         |  |
|                           | GlassesOrLenses                     | Do you use glasses/contact lenses?'                                         |          |                           |         |  |
|                           |                                     |                                                                             | 1        | Yes                       |         |  |
|                           |                                     |                                                                             | 2        | No                        |         |  |
|                           |                                     |                                                                             | 3        | Don't know                |         |  |
|                           |                                     |                                                                             | 97/98/99 | Missing                   |         |  |
|                           |                                     |                                                                             |          |                           |         |  |
|                           | GlassesOrLensesUsedFor              | purpose of glasses/lenses                                                   |          |                           |         |  |
|                           |                                     |                                                                             | 1        | Distance                  |         |  |
|                           |                                     |                                                                             | 2        | Reading                   |         |  |
|                           |                                     |                                                                             | 3        | Both distance & reading   |         |  |
|                           |                                     |                                                                             | 4        | Don't know                |         |  |
|                           |                                     |                                                                             | 97/98/99 | Missing                   |         |  |
|                           |                                     |                                                                             |          |                           |         |  |
|                           | EyesightTested                      | ...eyesight tested by an optician in the last 12 months?'                   |          |                           |         |  |
|                           |                                     |                                                                             | 1        | Yes                       |         |  |
|                           |                                     |                                                                             | 2        | No                        |         |  |
|                           |                                     |                                                                             | 3        | Don't know                |         |  |
|                           |                                     |                                                                             | 97/98/99 | Missing                   |         |  |
|                           |                                     |                                                                             |          |                           |         |  |
|                           | RecognisingPeople                   | ...difficulty recognising a friend across a crowded room?'                  |          |                           |         |  |
|                           |                                     |                                                                             | 1        | Yes                       |         |  |
|                           |                                     |                                                                             | 2        | No                        |         |  |
|                           |                                     |                                                                             | 3        | Don't know                |         |  |
|                           |                                     |                                                                             | 97/98/99 | Missing                   |         |  |
|                           |                                     |                                                                             |          |                           |         |  |
|                           | ReadingNewsprint                    | ...difficulty reading ordinary newsprint?'                                  |          |                           |         |  |
|                           |                                     |                                                                             | 1        | Yes                       |         |  |
|                           |                                     |                                                                             | 2        | No                        |         |  |
|                           |                                     |                                                                             | 3        | Don't know                |         |  |
|                           |                                     |                                                                             | 97/98/99 | Missing                   |         |  |
|                           |                                     |                                                                             |          |                           |         |  |
|                           | BlindorPartiallySighted             | Registered blind or partially sighted                                       |          |                           |         |  |
|                           |                                     |                                                                             | 1        | Yes                       |         |  |
|                           |                                     |                                                                             | 2        | No                        |         |  |
|                           |                                     |                                                                             | 3        | Don't know                |         |  |
|                           |                                     |                                                                             | 97/98/99 | Missing                   |         |  |
|                           |                                     |                                                                             |          |                           |         |  |
|                           | LeftEye                             | (no pinholes) is the participant able to read the following line of text?   |          |                           |         |  |
|                           |                                     |                                                                             | 1        | Yes                       |         |  |
|                           |                                     |                                                                             | 2        | No- form vision only      |         |  |
|                           |                                     |                                                                             | 3        | No- no vision             |         |  |
|                           |                                     |                                                                             | 97/98/99 | Missing                   |         |  |
|                           |                                     |                                                                             |          |                           |         |  |
|                           | LeftEyeYesMarginLabel               | logMAR margin of the last line read correctly                               | number   |                           |         |  |
|                           |                                     |                                                                             | 97/98/99 | Missing                   |         |  |
|                           |                                     |                                                                             |          |                           |         |  |
|                           | LeftEyeYesNumLettersMissed          | total number of letters missed or incorrectly read                          | number   |                           |         |  |
|                           |                                     |                                                                             | 97/98/99 |                           |         |  |
|                           |                                     |                                                                             |          |                           |         |  |
|                           | RightEye                            | (no pinholes) is the participant able to read the following line of text?   |          |                           |         |  |
|                           |                                     |                                                                             | 1        | Yes                       |         |  |
|                           |                                     |                                                                             | 2        | No- form vision only      |         |  |
|                           |                                     |                                                                             | 3        | No- no vision             |         |  |
|                           |                                     |                                                                             | 97/98/99 | Missing                   |         |  |
|                           |                                     |                                                                             |          |                           |         |  |
|                           | RightEyeYesMarginLabel              | logMAR margin of the last line read correctly                               | number   |                           |         |  |
|                           |                                     |                                                                             | 97/98/99 | Missing                   |         |  |
|                           |                                     |                                                                             |          |                           |         |  |
|                           | RightEyeYesNumLettersMissed         | total number of letters missed or incorrectly read                          | number   |                           |         |  |
|                           |                                     |                                                                             | 97/98/99 |                           |         |  |
|                           |                                     |                                                                             |          |                           |         |  |
|                           | LeftEyePinholes                     | (with pinholes) is the participant able to read the following line of text? |          |                           |         |  |
|                           |                                     |                                                                             | 1        | Yes                       |         |  |
|                           |                                     |                                                                             | 2        | No- form vision only      |         |  |
|                           |                                     |                                                                             | 3        | No- no vision             |         |  |
|                           |                                     |                                                                             | 97/98/99 | Missing                   |         |  |
|                           |                                     |                                                                             |          |                           |         |  |
|                           | LeftEyePinholesYesMarginLabel       | logMAR margin of the last line read correctly                               | number   |                           |         |  |
|                           |                                     |                                                                             | 97/98/99 | Missing                   |         |  |
|                           |                                     |                                                                             |          |                           |         |  |
|                           | LeftEyePinholesYesNumLettersMissed  | total number of letters missed or incorrectly read                          | number   |                           |         |  |
|                           |                                     |                                                                             | 97/98/99 |                           |         |  |
|                           |                                     |                                                                             |          |                           |         |  |
|                           | RightEyePinholes                    | (with pinholes) is the participant able to read the following line of text? |          |                           |         |  |
|                           |                                     |                                                                             | 1        | Yes                       |         |  |
|                           |                                     |                                                                             | 2        | No- form vision only      |         |  |
|                           |                                     |                                                                             | 3        | No- no vision             |         |  |
|                           |                                     |                                                                             | 97/98/99 | Missing                   |         |  |
|                           |                                     |                                                                             |          |                           |         |  |
|                           | RightEyePinholesYesMarginLabel      | logMAR margin of the last line read correctly                               | number   |                           |         |  |
|                           |                                     |                                                                             | 97/98/99 | Missing                   |         |  |
|                           |                                     |                                                                             |          |                           |         |  |
|                           | RightEyePinholesYesNumLettersMissed | total number of letters missed or incorrectly read                          | number   |                           |         |  |
|                           |                                     |                                                                             | 97/98/99 |                           |         |  |
|                           |                                     |                                                                             |          |                           |         |  |
|                           | CALC_LogMARLeftEye                  | no pinhole score                                                            | number   |                           |         |  |
|                           |                                     |                                                                             | 97/98/99 |                           |         |  |
|                           |                                     |                                                                             |          |                           |         |  |
|                           | CALC_LogMARRightEye                 | no pinhole score                                                            | number   |                           |         |  |
|                           |                                     |                                                                             | 97/98/99 |                           |         |  |
|                           |                                     |                                                                             |          |                           |         |  |
|                           | CALC_LogMARLeftEyePinholes          | with pinholes score                                                         | number   |                           |         |  |
|                           |                                     |                                                                             | 97/98/99 |                           |         |  |
|                           |                                     |                                                                             |          |                           |         |  |
|                           | CALC_LogMARRightEyePinholes         | with pinholes                                                               | number   |                           |         |  |
|                           |                                     |                                                                             | 97/98/99 |                           |         |  |

| Required Field (please X) | Variable                                         | Variable Label                                                                       | Values   | Value Label                           | comment |  |  |  |
|---------------------------|--------------------------------------------------|--------------------------------------------------------------------------------------|----------|---------------------------------------|---------|--|--|--|
|                           | SF-36HealthSurvey                                | In general how would you say your health is?'                                        | 1        | Excellent                             |         |  |  |  |
|                           |                                                  |                                                                                      | 2        | Very Good                             |         |  |  |  |
|                           |                                                  |                                                                                      | 3        | Good                                  |         |  |  |  |
|                           |                                                  |                                                                                      | 4        | Fair                                  |         |  |  |  |
|                           |                                                  |                                                                                      | 5        | Poor                                  |         |  |  |  |
|                           |                                                  |                                                                                      | 97/98/99 | Missing                               |         |  |  |  |
|                           |                                                  |                                                                                      |          |                                       |         |  |  |  |
|                           | healthComparedToAYearAgo                         | Compared to one year ago, how would your rate your health in general now?            | 1        | Much better now than one year ago     |         |  |  |  |
|                           |                                                  |                                                                                      | 2        | Somewhat better now than one year ago |         |  |  |  |
|                           |                                                  |                                                                                      | 3        | About the same as one year ago        |         |  |  |  |
|                           |                                                  |                                                                                      | 4        | Somewhat worse now than one year ago  |         |  |  |  |
|                           |                                                  |                                                                                      | 5        | Much worse now than one year ago      |         |  |  |  |
|                           |                                                  |                                                                                      | 97/98/99 | Missing                               |         |  |  |  |
|                           |                                                  |                                                                                      |          |                                       |         |  |  |  |
|                           | VigorousActivities_SF36Activities                | ...does you health now limit you in these activities? If so how much?'               | 1        | Limited a lot                         |         |  |  |  |
|                           | ModerateActivities_SF36Activities                |                                                                                      | 2        | Limited a little                      |         |  |  |  |
|                           | LiftingOrCarryingActivities_SF36Activities       |                                                                                      | 3        | Not limited at all                    |         |  |  |  |
|                           | ClimbingSeveralStairsActivities_SF36Activities   |                                                                                      | 97/98/99 | Missing                               |         |  |  |  |
|                           | ClimbingStairsActivities_SF36Activities          |                                                                                      |          |                                       |         |  |  |  |
|                           | BendingKneelingStoopingActivities_SF36Activities |                                                                                      |          |                                       |         |  |  |  |
|                           | WalkingMoreThanAMile_SF36Activities              |                                                                                      |          |                                       |         |  |  |  |
|                           | WalkingSeveralBlocksActivities_SF36Activities    |                                                                                      |          |                                       |         |  |  |  |
|                           | WalkingOneBlockActivities_SF36Activities         |                                                                                      |          |                                       |         |  |  |  |
|                           | BathingOrDressingYourself_SF36Activities         |                                                                                      |          |                                       |         |  |  |  |
|                           |                                                  |                                                                                      |          |                                       |         |  |  |  |
|                           | HealthIssuesReducedTimeSpentOnWork               | During the past 4 weeks, have you had any of the following problems with your work   | 1        | Yes                                   |         |  |  |  |
|                           | HealthIssuesAccomplishedLess                     |                                                                                      | 2        | No                                    |         |  |  |  |
|                           | HealthIssuesLimitedOtherActivities               |                                                                                      | 97/98/99 | Missing                               |         |  |  |  |
|                           | HealthIssuesDifficultiesPerformingWork           |                                                                                      |          |                                       |         |  |  |  |
|                           |                                                  |                                                                                      |          |                                       |         |  |  |  |
|                           | EmotionalIssuesReducedTimeSpentOnWork            | During the past 4 weeks, have you had any of the following problems with your work   | 1        | Yes                                   |         |  |  |  |
|                           | EmotionalIssuesAccomplishedLess                  |                                                                                      | 2        | No                                    |         |  |  |  |
|                           | EmotionalIssuesDidntDoWorkAsCarefully            |                                                                                      | 97/98/99 | Missing                               |         |  |  |  |
|                           |                                                  |                                                                                      |          |                                       |         |  |  |  |
|                           | HealthInterferedActivities                       | During the past 4 weeks, to what extent has your physical health or emotional proble | 1        | Not at all                            |         |  |  |  |
|                           |                                                  |                                                                                      | 2        | Slightly                              |         |  |  |  |
|                           |                                                  |                                                                                      | 3        | Moderately                            |         |  |  |  |
|                           |                                                  |                                                                                      | 4        | Quite a bit                           |         |  |  |  |
|                           |                                                  |                                                                                      | 5        | Extremely                             |         |  |  |  |
|                           |                                                  |                                                                                      | 97/98/99 | Missing                               |         |  |  |  |
|                           |                                                  |                                                                                      |          |                                       |         |  |  |  |
|                           | BodilyPain                                       | How much bodily pain have you had during the past 4 weeks?'                          | 1        | None                                  |         |  |  |  |
|                           |                                                  |                                                                                      | 2        | Very mild                             |         |  |  |  |
|                           |                                                  |                                                                                      | 3        | Mild                                  |         |  |  |  |
|                           |                                                  |                                                                                      | 4        | Moderate                              |         |  |  |  |
|                           |                                                  |                                                                                      | 5        | Severe                                |         |  |  |  |
|                           |                                                  |                                                                                      | 6        | Very severe                           |         |  |  |  |
|                           |                                                  |                                                                                      | 97/98/99 | Missing                               |         |  |  |  |
|                           |                                                  |                                                                                      |          |                                       |         |  |  |  |
|                           | PainInterfereWithWork                            | During the past 4 weeks, how much did pain interfere with your normal work (includi  | 1        | Not at all                            |         |  |  |  |
|                           |                                                  |                                                                                      | 2        | A little bit                          |         |  |  |  |
|                           |                                                  |                                                                                      | 3        | Moderately                            |         |  |  |  |
|                           |                                                  |                                                                                      | 4        | Quite a bit                           |         |  |  |  |
|                           |                                                  |                                                                                      | 5        | Extremely                             |         |  |  |  |
|                           |                                                  |                                                                                      | 97/98/99 | Missing                               |         |  |  |  |
|                           |                                                  |                                                                                      |          |                                       |         |  |  |  |
|                           | FeelFullOfPep_FeelingResponses                   | How much time during the past 4 weeks have/did you ...?'                             | 1        | All of the Time                       |         |  |  |  |
|                           | FeelNervous_FeelingResponses                     |                                                                                      | 2        | Most of the Time                      |         |  |  |  |
|                           | FeelDown_FeelingResponses                        |                                                                                      | 3        | A Good Bit of the Time                |         |  |  |  |
|                           | FeltCalm_FeelingResponses                        |                                                                                      | 4        | Some of the Time                      |         |  |  |  |
|                           | ALotOfEnergy_FeelingResponses                    |                                                                                      | 5        | A Little of the Time                  |         |  |  |  |
|                           | FeltDownhearted_FeelingResponses                 |                                                                                      | 6        | None of the Time                      |         |  |  |  |
|                           | FeelWornOut_FeelingResponses                     |                                                                                      | 97/98/99 | Missing                               |         |  |  |  |
|                           | BeenHappy_FeelingResponses                       |                                                                                      |          |                                       |         |  |  |  |
|                           | FeelTired_FeelingResponses                       |                                                                                      |          |                                       |         |  |  |  |
|                           |                                                  |                                                                                      |          |                                       |         |  |  |  |
|                           | HowOftenHealthInterferedActivities               | During the past 4 weeks, how much of the time has your physical health or emotiona   | 1        | All of the time                       |         |  |  |  |
|                           |                                                  |                                                                                      | 2        | Most of the time                      |         |  |  |  |
|                           |                                                  |                                                                                      | 3        | Some of the time                      |         |  |  |  |
|                           |                                                  |                                                                                      | 4        | A little of the time                  |         |  |  |  |
|                           |                                                  |                                                                                      | 5        | None of the time                      |         |  |  |  |
|                           |                                                  |                                                                                      | 97/98/99 | Missing                               |         |  |  |  |
|                           |                                                  |                                                                                      |          |                                       |         |  |  |  |
|                           | SickEasier_HealthExpectation                     | How True or False is each of the following statements for you?'                      | 1        | Definitely True                       |         |  |  |  |
|                           | HealthyasAnybody_HealthExpectation               |                                                                                      | 2        | Mostly True                           |         |  |  |  |
|                           | HealthToGetWorse_HealthExpectation               |                                                                                      | 3        | Don't Know                            |         |  |  |  |
|                           | HealthIsExcellent_HealthExpectation              |                                                                                      | 4        | Mostly False                          |         |  |  |  |
|                           |                                                  |                                                                                      | 5        | Definitely False                      |         |  |  |  |
|                           |                                                  |                                                                                      | 97/98/99 | Missing                               |         |  |  |  |
|                           | CALC_AvgSF36PhysicalFunctioning                  | total SF36 score for each domain                                                     | number   |                                       |         |  |  |  |
|                           | CALC_AvgSF36RoleLimitationPhysicalHealth         |                                                                                      |          |                                       |         |  |  |  |
|                           | CALC_AvgSF36RoleLimitationEmotionalProblems      |                                                                                      |          |                                       |         |  |  |  |
|                           | CALC_AvgSF36EnergyOrFatigue                      |                                                                                      |          |                                       |         |  |  |  |
|                           | CALC_AvgSF36EmotionalWellbeing                   |                                                                                      |          |                                       |         |  |  |  |
|                           | CALC_AvgSF36SocialFunctioning                    |                                                                                      |          |                                       |         |  |  |  |
|                           | CALC_AvgSF36Pain                                 |                                                                                      |          |                                       |         |  |  |  |
|                           | CALC_AvgSF36GeneralHealth                        |                                                                                      |          |                                       |         |  |  |  |
|                           | CALC_AvgSF36HealthChange                         |                                                                                      |          |                                       |         |  |  |  |

| Required<br>Field (please<br>X) | Variable                      | Variable Label                               | Values   | Value Label          | comment |
|---------------------------------|-------------------------------|----------------------------------------------|----------|----------------------|---------|
|                                 | MoCAAlternatingTrailMaking    | number letter sequencing                     | 1        | correct              |         |
|                                 | MoCAVisuoconsturctinalCube    | completion of 3D cube                        | 2        | incorrect            |         |
|                                 | MoCAVisuoconsturctinalContour | drawing of clock face outline                | 97/98/99 | Missing              |         |
|                                 | MoCAVisuoconsturctinalHands   | placement of clock hands                     |          |                      |         |
|                                 | MoCAVisuoconsturctinalNumbers | placement of clock numbers                   |          |                      |         |
|                                 |                               |                                              |          |                      |         |
|                                 | MocANamingLion                |                                              | 1        | correct              |         |
|                                 | MocANamingRhino               |                                              | 2        | incorrect            |         |
|                                 | MocANamingCamel               |                                              | 97/98/99 | Missing              |         |
|                                 |                               |                                              |          |                      |         |
|                                 | MoCADigitsBackward            | repetition of digits forward                 | 1        | correct              |         |
|                                 | MoCADigitsForward             | repetition of digits backwards               | 2        | incorrect            |         |
|                                 |                               |                                              | 97/98/99 | Missing              |         |
|                                 |                               |                                              |          |                      |         |
|                                 | MoCAVigalence                 | recognition of 'A' in letter sequence        | 1        | 0-1 error            |         |
|                                 |                               |                                              | 2        | >1 error             |         |
|                                 |                               |                                              | 97/98/99 | Missing              |         |
|                                 |                               |                                              |          |                      |         |
|                                 | MoCASerial                    | number of correct subtractions of 7 starting | 0        | correct subtractions |         |
|                                 |                               |                                              | 1        |                      |         |
|                                 |                               |                                              | 2        |                      |         |
|                                 |                               |                                              | 3        |                      |         |
|                                 |                               |                                              | 4        |                      |         |
|                                 |                               |                                              | 5        |                      |         |
|                                 |                               |                                              | 97/98/99 | Missing              |         |
|                                 |                               |                                              |          |                      |         |
|                                 | MoCASentenceRepetitionOne     | repeat sentence                              | 1        | correct              |         |
|                                 | MoCASentenceRepetitionTwo     | repeat sentence                              | 2        | incorrect            |         |
|                                 |                               |                                              | 97/98/99 | Missing              |         |
|                                 |                               |                                              |          |                      |         |
|                                 |                               |                                              |          |                      |         |
|                                 |                               |                                              |          |                      |         |
|                                 |                               |                                              |          |                      |         |
|                                 | MoCAVerbalFluency             | tell me as many words as you can beginning   | number   |                      |         |
|                                 |                               |                                              | 97/98/99 | Missing              |         |
|                                 |                               |                                              |          |                      |         |
|                                 |                               |                                              |          |                      |         |
|                                 |                               |                                              |          |                      |         |
|                                 |                               |                                              |          |                      |         |
|                                 | MoCAAbstractionOne            | what is the likeness of train and bicycle?   | 1        | correct              |         |
|                                 | MoCAAbstractionTwo            | what is the likeness of ruler and watch      | 2        | incorrect            |         |
|                                 |                               |                                              | 97/98/99 | Missing              |         |
|                                 |                               |                                              |          |                      |         |
|                                 |                               |                                              |          |                      |         |
|                                 | MoCADelayedRecallFace         | recall of words read earlier                 | 1        | recalled             |         |
|                                 | MoCADelayedRecallVelvet       |                                              | 2        | not recalled         |         |
|                                 | MoCADelayedRecallChurch       |                                              | 3        | incorrect            |         |
|                                 | MoCADelayedRecallDaisy        |                                              | 97/98/99 | Missing              |         |
|                                 | MoCADelayedRecallRed          |                                              |          |                      |         |
|                                 |                               |                                              |          |                      |         |
|                                 | MoCAOrientationDate           | orientation to time and place                | 1        | correct              |         |
|                                 | MoCAOrientationMonth          |                                              | 2        | incorrect            |         |
|                                 | MoCAOrientationYear           |                                              | 97/98/99 | Missing              |         |
|                                 | MoCAOrientationDay            |                                              |          |                      |         |
|                                 | MoCAOrientationPlace          |                                              |          |                      |         |
|                                 | MoCAOrientationCity           |                                              |          |                      |         |
|                                 |                               |                                              |          |                      |         |
|                                 | MoCAOrientationEducation      | years of formal education                    | 1        | <13                  |         |
|                                 |                               |                                              | 2        | >=13                 |         |
|                                 |                               |                                              | 97/98/99 | Missing              |         |
|                                 |                               |                                              |          |                      |         |
|                                 | CALC_MoCA                     | score out of 30 >=26 'normal'                | 0-30     |                      |         |
|                                 |                               |                                              | 97/98/99 | Missing              |         |
|                                 |                               |                                              |          |                      |         |
|                                 |                               |                                              |          |                      |         |
|                                 |                               |                                              |          |                      |         |

| Required Field (please X) | Variable                                       | Variable Label                                                                                                 | Values   | Value Label                                                        | comment |
|---------------------------|------------------------------------------------|----------------------------------------------------------------------------------------------------------------|----------|--------------------------------------------------------------------|---------|
|                           | MyocardialInfarction                           | Have you ever had a heart attack                                                                               | 1        | yes                                                                |         |
|                           | CongestiveHeartFailure                         | Have you ever been treated for heart failure?                                                                  | 2        | no                                                                 |         |
|                           | PeripheralVascularDisease                      | Have you had an operation to unclog or bypass the art                                                          | 3        | not sure                                                           |         |
|                           | CerebrovascularAccident                        | Have you had a stroke, cerebrovascular accident, bloo                                                          | 97/98/99 | Missing                                                            |         |
|                           | Hemiplegia                                     | Do you have difficulty moving an arm or leg as a result of the stroke or cerebrovascular accident?             |          |                                                                    |         |
|                           | Asthma                                         | Do you have asthma?                                                                                            |          |                                                                    |         |
|                           |                                                |                                                                                                                |          |                                                                    |         |
|                           |                                                |                                                                                                                |          |                                                                    |         |
|                           | AsthmaMedicines                                | Do you take medications for your asthma?'                                                                      | 2        | no                                                                 |         |
|                           |                                                |                                                                                                                | 1        | yes, only with flare ups of my asthma                              |         |
|                           |                                                |                                                                                                                | 3        | yes, I take medicine regularly even when I'm not having a flare up |         |
|                           |                                                |                                                                                                                | 97/98/99 | Missing                                                            |         |
|                           | emphysema                                      | Do you have emphysema, chronic bronchitis, or chron                                                            | 1        | yes                                                                |         |
|                           |                                                |                                                                                                                | 2        | no                                                                 |         |
|                           |                                                |                                                                                                                | 3        | not sure                                                           |         |
|                           |                                                |                                                                                                                | 97/98/99 | Missing                                                            |         |
|                           | emphysemaMedicines                             | Do you take medicines for your lung disease?'                                                                  | 2        | no                                                                 |         |
|                           |                                                |                                                                                                                | 1        | yes, only with flare ups                                           |         |
|                           |                                                |                                                                                                                | 3        | yes, I take medicine regularly even when I'm not having a flare up |         |
|                           |                                                |                                                                                                                | 97/98/99 | Missing                                                            |         |
|                           |                                                |                                                                                                                |          |                                                                    |         |
|                           | UlcerDisease                                   | Do you have stomach ulcers or peptic ulcer disease diagnosed by endoscopy or upper gi or barium swallow study? |          |                                                                    |         |
|                           |                                                |                                                                                                                |          |                                                                    |         |
|                           | HasDiabetes                                    | Do you have diabetes?                                                                                          | 1        | Yes, treated by modifying my diet                                  |         |
|                           |                                                |                                                                                                                | 2        | No                                                                 |         |
|                           |                                                |                                                                                                                | 3        | Yes, treated by medications taken by mouth                         |         |
|                           |                                                |                                                                                                                | 4        | Yes, treated by insulin                                            |         |
|                           |                                                |                                                                                                                | 97/98/99 | Missing                                                            |         |
|                           | DiabetesCausedProblems                         | Has the diabetes caused any of the following problem:                                                          | 1        | Problems with kidneys                                              |         |
|                           |                                                |                                                                                                                | 2        | Problems with eyes, treated by an ophthalmologist                  |         |
|                           |                                                |                                                                                                                | 3        | unsure                                                             |         |
|                           |                                                |                                                                                                                | 97/98/99 | Missing                                                            |         |
|                           | ProblemsWithKidneys                            | Have you ever had problems with your kidneys?'                                                                 | 1        | Poor kidney function (blood tests show high creatinine)            |         |
|                           |                                                |                                                                                                                | 2        | No                                                                 |         |
|                           |                                                |                                                                                                                | 3        | Have used hemodialysis or peritoneal dialysis                      |         |
|                           |                                                |                                                                                                                | 4        | Have received kidney transplantation                               |         |
|                           |                                                |                                                                                                                | 97/98/99 | Missing                                                            |         |
|                           |                                                |                                                                                                                |          |                                                                    |         |
|                           | ConnectiveTissueDisease                        | Do you have Rheumatoid Arthritis?                                                                              | 1        | Yes                                                                |         |
|                           |                                                |                                                                                                                | 2        | No                                                                 |         |
|                           |                                                |                                                                                                                | 3        | Not sure                                                           |         |
|                           |                                                |                                                                                                                | 97/98/99 | Missing                                                            |         |
|                           | ConnectiveTissueDiseaseMedications             | Do you take medications for it regularly?'                                                                     | 1        | Yes                                                                |         |
|                           |                                                |                                                                                                                | 2        | No                                                                 |         |
|                           |                                                |                                                                                                                | 3        | Not sure                                                           |         |
|                           |                                                |                                                                                                                | 97/98/99 | Missing                                                            |         |
|                           | ConnectiveTissueDiseaseType                    | do you have....?'                                                                                              | 1        | Lupua                                                              |         |
|                           |                                                |                                                                                                                | 2        | Polymyalgia rheumatica                                             |         |
|                           |                                                |                                                                                                                | 3        | neither lupus nor polymalgia                                       |         |
|                           |                                                |                                                                                                                | 4        | not sure                                                           |         |
|                           |                                                |                                                                                                                | 97/98/99 | Missing                                                            |         |
|                           | Dementia                                       | Do you have any of the following conditions..?                                                                 | 1        | Yes                                                                |         |
|                           | Cirrhosis                                      |                                                                                                                | 2        | No                                                                 |         |
|                           | Leukemia                                       |                                                                                                                | 3        | Not sure                                                           |         |
|                           | Lymphoma                                       |                                                                                                                | 97/98/99 | Missing                                                            |         |
|                           | Aids                                           |                                                                                                                |          |                                                                    |         |
|                           | Cancer                                         |                                                                                                                |          |                                                                    |         |
|                           |                                                | Has the cancer spread or metastasized to other parts c                                                         | 1        | Yes                                                                |         |
|                           | CancerSpread                                   |                                                                                                                | 2        | No                                                                 |         |
|                           |                                                |                                                                                                                | 3        | Not sure                                                           |         |
|                           |                                                |                                                                                                                | 97/98/99 | Missing                                                            |         |
|                           |                                                |                                                                                                                |          |                                                                    |         |
|                           | CALC_KatzCormbidity                            | total score plus age based on the Charlson index scorin                                                        | number   |                                                                    |         |
|                           | Hypertension                                   | Does the participant's GP record identify...                                                                   | 1        | Yes                                                                |         |
|                           | 15. Any atherosclerotic disease                |                                                                                                                | 2        | No                                                                 |         |
|                           | 16. Ischaemic heart disease                    |                                                                                                                | 3        | Met sure                                                           |         |
|                           | Any atherosclerotic disease                    |                                                                                                                | 2        | No                                                                 |         |
|                           | Ischaemic heart disease                        |                                                                                                                | 97/98/99 | Missing                                                            |         |
|                           | Cerebrovascular disease                        |                                                                                                                |          |                                                                    |         |
|                           | Peripheral vascular disease                    |                                                                                                                |          |                                                                    |         |
|                           | Heart failure                                  |                                                                                                                |          |                                                                    |         |
|                           | Atrial fibrillation                            |                                                                                                                |          |                                                                    |         |
|                           | Atrial flutter                                 |                                                                                                                |          |                                                                    |         |
|                           | Osteoarthritis                                 |                                                                                                                |          |                                                                    |         |
|                           | Cervical or lumbar spondylosis                 |                                                                                                                |          |                                                                    |         |
|                           | Rheumatoid arthritis                           |                                                                                                                |          |                                                                    |         |
|                           | Other arthritis (specified)                    |                                                                                                                |          |                                                                    |         |
|                           | Arthritis (type not specified)                 |                                                                                                                |          |                                                                    |         |
|                           | Joint replacement                              |                                                                                                                |          |                                                                    |         |
|                           | Cataract                                       |                                                                                                                |          |                                                                    |         |
|                           | Cataract surgery                               |                                                                                                                |          |                                                                    |         |
|                           | Age related macular degeneration               |                                                                                                                |          |                                                                    |         |
|                           | Glaucoma Diabetic eye disease                  |                                                                                                                |          |                                                                    |         |
|                           | Registered blind                               |                                                                                                                |          |                                                                    |         |
|                           | Registered partially sighted                   |                                                                                                                |          |                                                                    |         |
|                           | Any cancer                                     |                                                                                                                |          |                                                                    |         |
|                           | Any cancer, excluding nonmelanoma skin can     |                                                                                                                |          |                                                                    |         |
|                           | Any cancer <5 years since diagnosis            |                                                                                                                |          |                                                                    |         |
|                           | Chronic obstructive pulmonary disease (COPD)   |                                                                                                                |          |                                                                    |         |
|                           | Asthma                                         |                                                                                                                |          |                                                                    |         |
|                           | Other respiratory disease                      |                                                                                                                |          |                                                                    |         |
|                           | Diabetes mellitus                              |                                                                                                                |          |                                                                    |         |
|                           | Hypothyroidism                                 |                                                                                                                |          |                                                                    |         |
|                           | Hyperthyroidism                                |                                                                                                                |          |                                                                    |         |
|                           | Dementia                                       |                                                                                                                |          |                                                                    |         |
|                           | Parkinson's disease                            |                                                                                                                |          |                                                                    |         |
|                           | Anxiety                                        |                                                                                                                |          |                                                                    |         |
|                           | Depression                                     |                                                                                                                |          |                                                                    |         |
|                           | Anaemia: WHO criteria for haemoglobin con      |                                                                                                                |          |                                                                    |         |
|                           | Anaemia: Joosten's criterion for haemoglobi    |                                                                                                                |          |                                                                    |         |
|                           | Osteoporosis                                   |                                                                                                                |          |                                                                    |         |
|                           | Fractured hip, wrist or backbone               |                                                                                                                |          |                                                                    |         |
|                           |                                                |                                                                                                                |          |                                                                    |         |
|                           | Renal function using modification of diet in r |                                                                                                                | 1        | Normal/mildly reduced                                              |         |
|                           |                                                |                                                                                                                | 2        | Moderately reduced (stage 3++)                                     |         |
|                           |                                                |                                                                                                                | 3        | Severely reduced (Stage 4++)                                       |         |
|                           |                                                |                                                                                                                | 4        | Very severely reduced (stage 5++)                                  |         |

| Required Field (please X) | Variable                      | Variable Label                                                                 | Values   | Value Label | comment |
|---------------------------|-------------------------------|--------------------------------------------------------------------------------|----------|-------------|---------|
|                           | <b>FallsInLast12Months</b>    | in the last 12 months have you had a fall                                      | 1        | Yes         |         |
|                           |                               |                                                                                | 2        | no          |         |
|                           |                               |                                                                                | 3        | not sure    |         |
|                           |                               |                                                                                | 97/98/99 | missing     |         |
|                           |                               |                                                                                |          |             |         |
|                           | <b>HowManyFalls</b>           | How many times have you fallen in the last 12 months                           | number   |             |         |
|                           |                               |                                                                                | 97/98/99 | missing     |         |
|                           |                               |                                                                                |          |             |         |
|                           | <b>FallsFractures</b>         | ...have you broken any bones/had any fractures                                 | 1        | Yes         |         |
|                           |                               |                                                                                | 2        | no          |         |
|                           |                               |                                                                                | 3        | not sure    |         |
|                           |                               |                                                                                | 97/98/99 | missing     |         |
|                           |                               |                                                                                |          |             |         |
|                           | <b>FallsBrokenBones</b>       | How many times has a fall resulted in a broken bone                            | number   |             |         |
|                           |                               |                                                                                | 97/98/99 | missing     |         |
|                           |                               |                                                                                |          |             |         |
|                           | <b>FallsAccidentEmergency</b> | ...did you go to Accident and Emergency following a fall?                      | 1        | Yes         |         |
|                           |                               |                                                                                | 2        | no          |         |
|                           |                               |                                                                                | 3        | not sure    |         |
|                           |                               |                                                                                | 97/98/99 | missing     |         |
|                           |                               |                                                                                |          |             |         |
|                           | <b>FallsGetAandE</b>          | How many times did you attend Accident and Emergency                           | number   |             |         |
|                           |                               |                                                                                | 97/98/99 | missing     |         |
|                           |                               |                                                                                |          |             |         |
|                           |                               |                                                                                |          |             |         |
|                           | <b>FallsStayOvernight</b>     | ...were you admitted to a hospital following a fall?                           | 1        | Yes         |         |
|                           |                               |                                                                                | 2        | no          |         |
|                           |                               |                                                                                | 3        | not sure    |         |
|                           |                               |                                                                                | 97/98/99 | missing     |         |
|                           |                               |                                                                                |          |             |         |
|                           | <b>FallsGetAdmitted</b>       | How many times were you admitted to a hospital following a fall?               | number   |             |         |
|                           |                               |                                                                                | 97/98/99 | missing     |         |
|                           |                               |                                                                                |          |             |         |
|                           | <b>FallsSeenGP</b>            | Have you (or your carer) ever seen your General Practitioner about your falls? | 1        | Yes         |         |
|                           |                               |                                                                                | 2        | no          |         |
|                           |                               |                                                                                | 3        | not sure    |         |
|                           |                               |                                                                                | 97/98/99 | missing     |         |
|                           |                               |                                                                                |          |             |         |
|                           | <b>FallsSpecialist</b>        | Have you ever seen a falls specialist?                                         | 1        | Yes         |         |
|                           |                               |                                                                                | 2        | no          |         |
|                           |                               |                                                                                | 3        | not sure    |         |
|                           |                               |                                                                                | 97/98/99 | missing     |         |
|                           |                               |                                                                                |          |             |         |
|                           | <b>LossOfConfidence</b>       | Have your falls caused any of the following?                                   | 1        | Yes         |         |
|                           | <b>WorryAboutFalling</b>      |                                                                                | 2        | no          |         |
|                           | <b>GoingOutLessOften</b>      |                                                                                | 3        | not sure    |         |
|                           | <b>IncreaseCareReceive</b>    |                                                                                | 97/98/99 | missing     |         |

| Required<br>Field (please<br>X) | Variable                                      | Variable Label                                                    | Values   | Value Label | comment |
|---------------------------------|-----------------------------------------------|-------------------------------------------------------------------|----------|-------------|---------|
|                                 | TookPresMed                                   | Number of prescribed medications                                  | number   |             |         |
|                                 |                                               |                                                                   | 97/98/99 | Missing     |         |
|                                 |                                               |                                                                   |          |             |         |
|                                 | Medication*_MedicationName                    | Name of prescribed medication 1-30                                | verbatim |             |         |
|                                 |                                               |                                                                   | 97/98/99 | Missing     |         |
|                                 |                                               |                                                                   |          |             |         |
|                                 | Medication*_Dosage                            | Dosage of prescribed medications                                  | number   |             |         |
|                                 |                                               | verbatim                                                          | 97/98/99 | Missing     |         |
|                                 |                                               |                                                                   |          |             |         |
|                                 | Medication*_Frequency                         | Frequency of prescribed medication                                | number   |             |         |
|                                 |                                               |                                                                   | 97/98/99 | Missing     |         |
|                                 |                                               |                                                                   |          |             |         |
|                                 | TookNonPresMed                                | Number of non-prescribed medicines, vitamin or mineral supplement | number   |             |         |
|                                 |                                               |                                                                   | 97/98/99 | Missing     |         |
|                                 |                                               |                                                                   |          |             |         |
|                                 | NonPresMedication*_NonPresMedicationName      | Name of non-prescribed medication 1-30                            | verbatim |             |         |
|                                 |                                               |                                                                   | 97/98/99 | Missing     |         |
|                                 |                                               |                                                                   |          |             |         |
|                                 | NonPresMedication*_NonPresMedicationDosage    | Dosage of non-prescribed medications                              | number   |             |         |
|                                 |                                               | verbatim                                                          | 97/98/99 | Missing     |         |
|                                 |                                               |                                                                   |          |             |         |
|                                 | NonPresMedication*_NonPresMedicationFrequency | Frequency of non-prescribed medication                            | number   |             |         |
|                                 |                                               |                                                                   | 97/98/99 | Missing     |         |
|                                 |                                               |                                                                   |          |             |         |
|                                 | COUNT_PrescribedMedication                    |                                                                   | number   |             |         |
|                                 |                                               |                                                                   |          |             |         |
|                                 | COUNT_NonPrescribedMedication                 |                                                                   | number   |             |         |



| Required Field (please X) |                                                  |                                                           |                                                           |                                                                  |    |  |  |  |  |
|---------------------------|--------------------------------------------------|-----------------------------------------------------------|-----------------------------------------------------------|------------------------------------------------------------------|----|--|--|--|--|
|                           | Variable                                         | Variable Label                                            | Values                                                    | Value Label comment                                              |    |  |  |  |  |
|                           | WalkAroundOutside_NEADLPartOne                   | ...what have you <i>actually</i> done in the last 30 days | 0                                                         | not at all                                                       |    |  |  |  |  |
|                           | ClimbStairs_NEADLPartOne                         |                                                           | 1                                                         | with help                                                        |    |  |  |  |  |
|                           | GetInAndOutOfCar_NEADLPartOne                    |                                                           | 2                                                         | on your own with difficulty                                      |    |  |  |  |  |
|                           | WalkOverUnevenGround_NEADLPartOne                |                                                           | 3                                                         | on your own                                                      |    |  |  |  |  |
|                           | CossRoads_NEADLPartOne                           |                                                           | 97/98/99                                                  | Missing                                                          |    |  |  |  |  |
|                           | TravelOnPublicTransport_NEADLPartOne             |                                                           |                                                           |                                                                  |    |  |  |  |  |
|                           | ManageToFeedYourself_NEADLPartOne                |                                                           |                                                           |                                                                  |    |  |  |  |  |
|                           | MakeYourselfAHotDrink_NEADLPartOne               |                                                           |                                                           |                                                                  |    |  |  |  |  |
|                           | TakeHotDrinksFromOneDrinksToAnother_NEADLPartOne |                                                           |                                                           |                                                                  |    |  |  |  |  |
|                           | DoTheWashingUp_NEADLPartOne                      |                                                           |                                                           |                                                                  |    |  |  |  |  |
|                           | MakeYourselfAHotSnack_NEADLPartOne               |                                                           |                                                           |                                                                  |    |  |  |  |  |
|                           |                                                  |                                                           |                                                           |                                                                  |    |  |  |  |  |
|                           | ManageOwnMoney_NEADLPartTwo                      |                                                           | ...what have you <i>actually</i> done in the last 30 days | 0                                                                | no |  |  |  |  |
|                           | WashItemsOfClothing_NEADLPartTwo                 | 1                                                         |                                                           | with help                                                        |    |  |  |  |  |
|                           | DoOwnHousework_NEADLPartTwo                      | 2                                                         |                                                           | on your own with difficulty                                      |    |  |  |  |  |
|                           | DoOwnShopping_NEADLPartTwo                       | 3                                                         |                                                           | on your own                                                      |    |  |  |  |  |
|                           | DoFullClothesWash_NEADLPartTwo                   | 97/98/99                                                  |                                                           | Missing                                                          |    |  |  |  |  |
|                           | ReadNewspapersOrBooks_NEADLPartTwo               |                                                           |                                                           |                                                                  |    |  |  |  |  |
|                           | UseTelephone_NEADLPartTwo                        |                                                           |                                                           |                                                                  |    |  |  |  |  |
|                           | WriteLetters_NEADLPartTwo                        |                                                           |                                                           |                                                                  |    |  |  |  |  |
|                           | GoOutSocially_NEADLPartTwo                       |                                                           |                                                           |                                                                  |    |  |  |  |  |
|                           | ManageGarden_NEADLPartTwo                        |                                                           |                                                           |                                                                  |    |  |  |  |  |
|                           | Drive_NEADLPartTwo                               |                                                           |                                                           |                                                                  |    |  |  |  |  |
|                           |                                                  |                                                           |                                                           |                                                                  |    |  |  |  |  |
|                           | CALC_NEADL                                       | Total NEADL. Higher score = more independent              |                                                           | number 0-66                                                      |    |  |  |  |  |
|                           |                                                  |                                                           | 97/98/99                                                  | Missing                                                          |    |  |  |  |  |
|                           |                                                  |                                                           |                                                           |                                                                  |    |  |  |  |  |
|                           | Feeding                                          | Do you have any difficulty with the following?            | 0                                                         | uanble                                                           |    |  |  |  |  |
|                           |                                                  |                                                           | 1                                                         | needs help cutting, spreading butter or requires modified diet   |    |  |  |  |  |
|                           |                                                  |                                                           | 2                                                         | independent                                                      |    |  |  |  |  |
|                           |                                                  |                                                           | 97/98/99                                                  | Missing                                                          |    |  |  |  |  |
|                           |                                                  |                                                           |                                                           |                                                                  |    |  |  |  |  |
|                           | Bathing                                          |                                                           | 0                                                         | dependent                                                        |    |  |  |  |  |
|                           |                                                  |                                                           | 1                                                         | independent (or in shower)                                       |    |  |  |  |  |
|                           |                                                  |                                                           | 97/98/99                                                  | Missing                                                          |    |  |  |  |  |
|                           |                                                  |                                                           |                                                           |                                                                  |    |  |  |  |  |
|                           | Grooming                                         |                                                           | 0                                                         | needs help with personal care                                    |    |  |  |  |  |
|                           |                                                  |                                                           | 1                                                         | independent face/hair/teeth/shaving                              |    |  |  |  |  |
|                           |                                                  |                                                           | 97/98/99                                                  | Missing                                                          |    |  |  |  |  |
|                           |                                                  |                                                           |                                                           |                                                                  |    |  |  |  |  |
|                           | Dressing                                         |                                                           | 0                                                         | dependent                                                        |    |  |  |  |  |
|                           |                                                  |                                                           | 1                                                         | needs help but can do about half unaided                         |    |  |  |  |  |
|                           |                                                  |                                                           | 2                                                         | independent including buttons and zips                           |    |  |  |  |  |
|                           |                                                  |                                                           | 97/98/99                                                  | Missing                                                          |    |  |  |  |  |
|                           |                                                  |                                                           |                                                           |                                                                  |    |  |  |  |  |
|                           | Bowels                                           |                                                           | 0                                                         | incontinent or needs enemas                                      |    |  |  |  |  |
|                           |                                                  |                                                           | 1                                                         | occasional accident                                              |    |  |  |  |  |
|                           |                                                  |                                                           | 2                                                         | continent                                                        |    |  |  |  |  |
|                           |                                                  |                                                           | 97/98/99                                                  | Missing                                                          |    |  |  |  |  |
|                           |                                                  |                                                           |                                                           |                                                                  |    |  |  |  |  |
|                           | Bladder                                          |                                                           | 0                                                         | unable (or catheterised and unable to manage alone)              |    |  |  |  |  |
|                           |                                                  |                                                           | 1                                                         | occasional accident                                              |    |  |  |  |  |
|                           |                                                  |                                                           | 2                                                         | continent                                                        |    |  |  |  |  |
|                           |                                                  |                                                           | 97/98/99                                                  | Missing                                                          |    |  |  |  |  |
|                           |                                                  |                                                           |                                                           |                                                                  |    |  |  |  |  |
|                           | ToiletUse                                        |                                                           | 0                                                         | dependent                                                        |    |  |  |  |  |
|                           |                                                  |                                                           | 1                                                         | needs some help but can so somethings alone                      |    |  |  |  |  |
|                           |                                                  |                                                           | 2                                                         | independent (on/off an wiping)                                   |    |  |  |  |  |
|                           |                                                  |                                                           | 97/98/99                                                  | Missing                                                          |    |  |  |  |  |
|                           |                                                  |                                                           |                                                           |                                                                  |    |  |  |  |  |
|                           | Transfers                                        |                                                           | 0                                                         | unable, no sitting balance                                       |    |  |  |  |  |
|                           |                                                  |                                                           | 1                                                         | major help (one or two people physical) can sit up               |    |  |  |  |  |
|                           |                                                  |                                                           | 2                                                         | minor help (verbal or physical)                                  |    |  |  |  |  |
|                           |                                                  |                                                           | 3                                                         | independent                                                      |    |  |  |  |  |
|                           |                                                  |                                                           | 97/98/99                                                  | Missing                                                          |    |  |  |  |  |
|                           |                                                  |                                                           |                                                           |                                                                  |    |  |  |  |  |
|                           | Mobility                                         |                                                           | 0                                                         | immobile or <50 yards                                            |    |  |  |  |  |
|                           |                                                  |                                                           | 1                                                         | wheelchair independent including corners >50 yards               |    |  |  |  |  |
|                           |                                                  |                                                           | 2                                                         | walks with the help of one person (verbal or physical) >50 yards |    |  |  |  |  |
|                           |                                                  |                                                           | 3                                                         | independent but may use any walking aide >50 yards               |    |  |  |  |  |
|                           |                                                  |                                                           | 97/98/99                                                  | Missing                                                          |    |  |  |  |  |
|                           |                                                  |                                                           |                                                           |                                                                  |    |  |  |  |  |
|                           | Stairs                                           |                                                           | 0                                                         | unable                                                           |    |  |  |  |  |
|                           |                                                  |                                                           | 1                                                         | needs help (verbal physical, carrying aid)                       |    |  |  |  |  |
|                           |                                                  |                                                           | 2                                                         | independent                                                      |    |  |  |  |  |
|                           |                                                  |                                                           | 97/98/99                                                  | Missing                                                          |    |  |  |  |  |
|                           |                                                  |                                                           |                                                           |                                                                  |    |  |  |  |  |
|                           | CALC_Barthel_Index                               | Total BARTHEL. Higher score means more independent        | number 0-20                                               |                                                                  |    |  |  |  |  |
|                           |                                                  |                                                           | 97/98/99                                                  | Missing                                                          |    |  |  |  |  |
|                           |                                                  |                                                           |                                                           |                                                                  |    |  |  |  |  |

| Required Field (please X) | Variable                        | Variable Label                                 | Values       | Value Label                | comment |  |
|---------------------------|---------------------------------|------------------------------------------------|--------------|----------------------------|---------|--|
|                           | HeightWeighttimeofDay           | time measurements are taken                    | hh.mm        |                            |         |  |
|                           |                                 |                                                |              |                            |         |  |
|                           | Demispan                        | from middel of collar bone to index finger     | number cm    |                            |         |  |
|                           |                                 |                                                |              |                            |         |  |
|                           | DemispanHeight                  | Calculation of height from demispan            | number cm    |                            |         |  |
|                           |                                 |                                                |              |                            |         |  |
|                           | Height                          |                                                | number cm    |                            |         |  |
|                           |                                 |                                                |              |                            |         |  |
|                           | Weight                          |                                                | number kg    |                            |         |  |
|                           |                                 |                                                |              |                            |         |  |
|                           | BodyFatPercentage               |                                                | number %     |                            |         |  |
|                           |                                 |                                                |              |                            |         |  |
|                           | FatMass                         |                                                | number kg    |                            |         |  |
|                           |                                 |                                                |              |                            |         |  |
|                           | FatFreeMass                     |                                                | number kg    |                            |         |  |
|                           |                                 |                                                |              |                            |         |  |
|                           | BodyWaterPercentage             |                                                | number %     |                            |         |  |
|                           |                                 |                                                |              |                            |         |  |
|                           | MuscleMass                      |                                                | number kg    |                            |         |  |
|                           |                                 |                                                |              |                            |         |  |
|                           | BoneMass                        |                                                | number kg    |                            |         |  |
|                           |                                 |                                                |              |                            |         |  |
|                           | CALC_DemiSpanHeight             |                                                |              |                            |         |  |
|                           |                                 |                                                |              |                            |         |  |
|                           | CALC_BMI                        | mass (kg) /demi span height (m)2               | number       |                            |         |  |
|                           |                                 |                                                |              |                            |         |  |
|                           | WeightLoss                      | In the last year, have you lost more than 10lb | 1            | yes                        |         |  |
|                           |                                 |                                                | 2            | no                         |         |  |
|                           |                                 |                                                | 3            | not sure                   |         |  |
|                           |                                 |                                                | 97/98/99     | Missing                    |         |  |
|                           |                                 |                                                |              |                            |         |  |
|                           | SittingBloodPresssure           |                                                | yes          | 1                          |         |  |
|                           |                                 |                                                | no           | 2                          |         |  |
|                           |                                 |                                                | 97/98/99     | Missing                    |         |  |
|                           |                                 |                                                |              |                            |         |  |
|                           | ReasonNoSittingBloodPressure    |                                                | verbatim     |                            |         |  |
|                           |                                 |                                                | 1            | Participant refused        |         |  |
|                           |                                 |                                                | 3            | Cuff the wrong size        |         |  |
|                           |                                 |                                                | 4            | Monitor malfunction        |         |  |
|                           |                                 |                                                | 5            | StandingBloodPressureTaken |         |  |
|                           |                                 |                                                |              |                            |         |  |
|                           | SittingSystolic                 | BP reading                                     | number mm Hg |                            |         |  |
|                           | Sitting Diastolic               | BP reading                                     | 97/98/99     | Missing                    |         |  |
|                           | SittingPulse                    | pulse                                          |              |                            |         |  |
|                           |                                 |                                                |              |                            |         |  |
|                           | StandingBloodPresssure          |                                                | yes          | 1                          |         |  |
|                           |                                 |                                                | no           | 2                          |         |  |
|                           |                                 |                                                | 97/98/99     | Missing                    |         |  |
|                           |                                 |                                                |              |                            |         |  |
|                           | ReasonNoStandingBloodPressure   |                                                | verbatim     |                            |         |  |
|                           |                                 |                                                |              |                            |         |  |
|                           | StandingSystolic                | BP reading                                     | number mm Hg |                            |         |  |
|                           | Standing Diastolic              | BP reading                                     | 97/98/99     | Missing                    |         |  |
|                           | StandingPulse                   | pulse                                          |              |                            |         |  |
|                           |                                 |                                                |              |                            |         |  |
|                           | DominantHand                    | Which is the dominant hand?                    | 1            | right                      |         |  |
|                           |                                 |                                                | 2            | left                       |         |  |
|                           |                                 |                                                |              |                            |         |  |
|                           | DominantHandFirstAttempt        | grip strength in dominant hand                 | number kPA   |                            |         |  |
|                           | DominantHandSecondAttempt       |                                                |              |                            |         |  |
|                           | DominantHandThirdAttempt        |                                                |              |                            |         |  |
|                           |                                 |                                                |              |                            |         |  |
|                           | NondominantHandFirstAttempt     | grip strength in passive hand                  | number kPA   |                            |         |  |
|                           | NondominantHandSecondAttempt    |                                                |              |                            |         |  |
|                           | NondominantHandThirdAttempt     |                                                |              |                            |         |  |
|                           |                                 |                                                |              |                            |         |  |
|                           | CALC_DominantMeanGripStrength   | mean grip strength dominant hand               | number kPA   |                            |         |  |
|                           | CAL_NonDominantMeanGripStrength | mean grip strength passive hand                |              |                            |         |  |



| Required<br>Field (please<br>X) |                      |                                                                           |                |                              |         |
|---------------------------------|----------------------|---------------------------------------------------------------------------|----------------|------------------------------|---------|
|                                 | Variable             | Variable Label                                                            | Values         | Value Label                  | comment |
|                                 | WalkTime             | over a 3 metre distance                                                   | number seconds |                              |         |
|                                 |                      |                                                                           | 97/98/99       | Missing                      |         |
|                                 |                      |                                                                           |                |                              |         |
|                                 | ExhaustionPartA      | How often in the last week did you feel 'everything I did was an effort?' | 0              | rarely or none of the time   |         |
|                                 |                      |                                                                           | 1              | some or a little of the time |         |
|                                 |                      |                                                                           | 2              | moderate amount of the time  |         |
|                                 |                      |                                                                           | 3              | most of the time             |         |
|                                 |                      |                                                                           | 97/98/99       | Missing                      |         |
|                                 |                      |                                                                           |                |                              |         |
|                                 | ExhaustionPartB      | How often in the last week did you feel 'I could not get going'?          | 0              | rarely or none of the time   |         |
|                                 |                      |                                                                           | 1              | some or a little of the time |         |
|                                 |                      |                                                                           | 2              | moderate amount of the time  |         |
|                                 |                      |                                                                           | 3              | most of the time             |         |
|                                 |                      |                                                                           | 97/98/99       | Missing                      |         |
|                                 |                      |                                                                           |                |                              |         |
|                                 | TUGTSkipped          | was the TUGT missed out?                                                  | 1              | yes                          |         |
|                                 |                      |                                                                           | 2              | no                           |         |
|                                 |                      |                                                                           |                |                              |         |
|                                 | TUGNotDoneReason     | reason for skipping TUGT                                                  | verbatim       |                              |         |
|                                 |                      |                                                                           |                |                              |         |
|                                 | chairUsed            |                                                                           | 1              | yes                          |         |
|                                 |                      |                                                                           | 2              | no                           |         |
|                                 |                      |                                                                           |                |                              |         |
|                                 | ChairHeight          | height of the chair used to stand up from                                 | number mm      |                              |         |
|                                 |                      |                                                                           |                |                              |         |
|                                 | AbleToGetUpFromChair |                                                                           | 1              | yes                          |         |
|                                 |                      |                                                                           | 2              | no                           |         |
|                                 |                      |                                                                           | 97/98/99       | Missing                      |         |
|                                 |                      |                                                                           |                |                              |         |
|                                 | TimeToGetUp          | time taken to complete in seconds                                         | number secs.   |                              |         |
|                                 |                      |                                                                           | 97/98/99       | Missing                      |         |
|                                 |                      |                                                                           |                |                              |         |
|                                 | WalkingAidUsed       | walking aid used to complete the TUGT                                     | 1              | Independent                  |         |
|                                 |                      |                                                                           | 2              | 1x walking stick             |         |
|                                 |                      |                                                                           | 3              | 2x walking sticks            |         |
|                                 |                      |                                                                           | 4              | Walking Zimmer frame         |         |
|                                 |                      |                                                                           | 5              | Wheeled Zimmer frame         |         |
|                                 |                      |                                                                           | 6              | 3-wheeled walker             |         |
|                                 |                      |                                                                           | 7              | 4-wheeled walker             |         |
|                                 |                      |                                                                           | 8              | Kitchen trolley              |         |
|                                 |                      |                                                                           | 97/98/99       | Missing                      |         |

| Required Field (please X) | Variable                                                                                                                                                                                                                                                       | Variable Label                                       | Values                                          | Value Label comment                                                                                                                                                                                                                                                                                                                                                                                                                                                                                                                                                                                                                                                                                                                                                                                    |
|---------------------------|----------------------------------------------------------------------------------------------------------------------------------------------------------------------------------------------------------------------------------------------------------------|------------------------------------------------------|-------------------------------------------------|--------------------------------------------------------------------------------------------------------------------------------------------------------------------------------------------------------------------------------------------------------------------------------------------------------------------------------------------------------------------------------------------------------------------------------------------------------------------------------------------------------------------------------------------------------------------------------------------------------------------------------------------------------------------------------------------------------------------------------------------------------------------------------------------------------|
|                           | ClinicalFrailtyResearcher                                                                                                                                                                                                                                      | Researcher frailty assessment based on observation   | 1<br>2<br>3<br>4<br>5<br>6<br>7<br>99           | very fit; robust, active, energetic, well motivated and fit. These people commonly exercise regularly and are in the most fit group for their age<br>well; without active disease, but less fit than people in category 1<br>well; with terated comorbid disease. Disease symptoms are controlled compared with those in category 4<br>apparently vulnerable; although not frankly dependent, these people commonly complain of beign 'slowed up' or have disease symptoms<br>mildly frail; with limited dependence on others for instrumental activities of daily living<br>moderately frail; help is needed with both instrumental and non-instrumental activities of daily living<br>severely frail; completely dependent on others for the activities of daily living or terminally ill<br>missing |
|                           | ClinicalFrailtyIsClinicianPresent                                                                                                                                                                                                                              | Is a registrar present to complete 2nd part of the a | 1<br>2                                          | yes<br>no                                                                                                                                                                                                                                                                                                                                                                                                                                                                                                                                                                                                                                                                                                                                                                                              |
|                           | ClinicalFrailtyClinican                                                                                                                                                                                                                                        | Clinician frailty assessment based on observation    | 1<br>2<br>3<br>4<br>5<br>6<br>7<br>99           | very fit; robust, active, energetic, well motivated and fit. These people commonly exercise regularly and are in the most fit group for their age<br>well; without active disease, but less fit htan people in category 1<br>well; with terated comorbid disease. Disease symptoms are controlled compared with those in category 4<br>apparently vulnerable; although not frankly dependent, these people commonly complain of beign 'slowed up' or have disease symptoms<br>mildly frail; with limited dependence on others for instrumental activities of daily living<br>moderately frail; help is needed with both instrumental and non-instrumental activities of daily living<br>severely frail; completely dependent on others for the activities of daily living or terminally ill<br>missing |
|                           | CALC_FriedTotalScore                                                                                                                                                                                                                                           | Fried frailty score                                  | 0<br>1<br>2<br>3<br>4<br>5<br>97/98/99          | not frail<br>pre frail<br>pre frail<br>mild frailty<br>moderate frailty<br>severe frailty<br>missing                                                                                                                                                                                                                                                                                                                                                                                                                                                                                                                                                                                                                                                                                                   |
|                           | PenFromHand                                                                                                                                                                                                                                                    | Can you take this oen from my hand if I hold it her  | 1<br>2<br>97/98/99                              | yes<br>no<br>missing                                                                                                                                                                                                                                                                                                                                                                                                                                                                                                                                                                                                                                                                                                                                                                                   |
|                           | BustrainTimetable                                                                                                                                                                                                                                              | Are you able to use a bus or train timetable?"       | 1<br>2<br>97/98/99                              | yes<br>no<br>missing                                                                                                                                                                                                                                                                                                                                                                                                                                                                                                                                                                                                                                                                                                                                                                                   |
|                           | SitUprightforTwoHours                                                                                                                                                                                                                                          | Are you able to sit upright in a chair for two hours | 1<br>2                                          | yes<br>no                                                                                                                                                                                                                                                                                                                                                                                                                                                                                                                                                                                                                                                                                                                                                                                              |
|                           | CoinFromTable                                                                                                                                                                                                                                                  | Are you able to pick up a 10p coin from a table?"    | 1<br>2<br>97/98/99                              | yes<br>no<br>missing                                                                                                                                                                                                                                                                                                                                                                                                                                                                                                                                                                                                                                                                                                                                                                                   |
|                           | EFS Cognition                                                                                                                                                                                                                                                  | draw 10 past 11 on clock face                        | 0<br>1<br>2<br>97/98/99                         | no errors<br>minor spacing errors<br>other errors<br>missing                                                                                                                                                                                                                                                                                                                                                                                                                                                                                                                                                                                                                                                                                                                                           |
|                           | EFSAdmitted                                                                                                                                                                                                                                                    | How many hospital admissions in the past year        | 0<br>1<br>2<br>97/98/99                         | 0<br>1 or 2<br>>2<br>missing                                                                                                                                                                                                                                                                                                                                                                                                                                                                                                                                                                                                                                                                                                                                                                           |
|                           | EFS SocialSupport                                                                                                                                                                                                                                              | can you count on someone?                            | 0<br>1<br>2<br>97/98/99                         | always<br>sometimes<br>never<br>missing                                                                                                                                                                                                                                                                                                                                                                                                                                                                                                                                                                                                                                                                                                                                                                |
|                           | EFSForgetMedication                                                                                                                                                                                                                                            | At times do you forget to take your prescription m   | 0<br>1<br>97/98/99                              | no<br>yes<br>missing                                                                                                                                                                                                                                                                                                                                                                                                                                                                                                                                                                                                                                                                                                                                                                                   |
|                           | EFSNutrition                                                                                                                                                                                                                                                   | Have you lost weight and clothes become loose?       | 0<br>1<br>97/98/99                              | no<br>yes<br>missing                                                                                                                                                                                                                                                                                                                                                                                                                                                                                                                                                                                                                                                                                                                                                                                   |
|                           | EFSMood                                                                                                                                                                                                                                                        | Do you often feel sad or depressed?"                 | 0<br>1<br>97/98/99                              | no<br>yes<br>missing                                                                                                                                                                                                                                                                                                                                                                                                                                                                                                                                                                                                                                                                                                                                                                                   |
|                           | EFSContinence                                                                                                                                                                                                                                                  | Do you have a problem losing control of urine whe    | 0<br>1<br>97/98/99                              | no<br>yes<br>missing                                                                                                                                                                                                                                                                                                                                                                                                                                                                                                                                                                                                                                                                                                                                                                                   |
|                           | CALC_EdmontonFrailScale                                                                                                                                                                                                                                        | total score out of 17                                | 0-5<br>6-7<br>8-9<br>10-11<br>12-17<br>97/98/99 | not frail<br>vulnerable<br>mild frailty<br>moderate frailty<br>severe frailty<br>missing                                                                                                                                                                                                                                                                                                                                                                                                                                                                                                                                                                                                                                                                                                               |
|                           | EFIGPScore                                                                                                                                                                                                                                                     | data extracted from GP summary records               |                                                 |                                                                                                                                                                                                                                                                                                                                                                                                                                                                                                                                                                                                                                                                                                                                                                                                        |
|                           | Fit (eFI score 0 - 0.12) : People who have no or few long-term conditions that are usually well controlled. This group would mainly be independent in day to day living activities.                                                                            |                                                      |                                                 |                                                                                                                                                                                                                                                                                                                                                                                                                                                                                                                                                                                                                                                                                                                                                                                                        |
|                           | Mild frailty (eFI score 0.13 – 0.24) : People who are slowing up in older age and may need help with personal activities of daily living such as finances, shopping, transportation.                                                                           |                                                      |                                                 |                                                                                                                                                                                                                                                                                                                                                                                                                                                                                                                                                                                                                                                                                                                                                                                                        |
|                           | Moderate Frailty (eFI score 0.25 – 0.36) : People who have difficulties with outdoor activities and may have mobility problems or require help with activites such as washing and dressing.                                                                    |                                                      |                                                 |                                                                                                                                                                                                                                                                                                                                                                                                                                                                                                                                                                                                                                                                                                                                                                                                        |
|                           | Severe Frailty (eFI score > 0.36) : People who are often dependent for personal cares and have a range of long-term conditions/multimorbidity. Some of this group may be medically stable but others can be unstable and at risk of dying within 6 - 12 months |                                                      |                                                 |                                                                                                                                                                                                                                                                                                                                                                                                                                                                                                                                                                                                                                                                                                                                                                                                        |
|                           |                                                                                                                                                                                                                                                                | 99 missing                                           |                                                 |                                                                                                                                                                                                                                                                                                                                                                                                                                                                                                                                                                                                                                                                                                                                                                                                        |
|                           | CALC_ELSAFrailtyIndex                                                                                                                                                                                                                                          |                                                      |                                                 |                                                                                                                                                                                                                                                                                                                                                                                                                                                                                                                                                                                                                                                                                                                                                                                                        |
|                           |                                                                                                                                                                                                                                                                | 0-10 very fit                                        |                                                 |                                                                                                                                                                                                                                                                                                                                                                                                                                                                                                                                                                                                                                                                                                                                                                                                        |
|                           |                                                                                                                                                                                                                                                                | 11-14 well                                           |                                                 |                                                                                                                                                                                                                                                                                                                                                                                                                                                                                                                                                                                                                                                                                                                                                                                                        |
|                           |                                                                                                                                                                                                                                                                | 15-24 vulnerable                                     |                                                 |                                                                                                                                                                                                                                                                                                                                                                                                                                                                                                                                                                                                                                                                                                                                                                                                        |
|                           |                                                                                                                                                                                                                                                                | >=25 frail                                           |                                                 |                                                                                                                                                                                                                                                                                                                                                                                                                                                                                                                                                                                                                                                                                                                                                                                                        |
|                           |                                                                                                                                                                                                                                                                | missing 99                                           |                                                 |                                                                                                                                                                                                                                                                                                                                                                                                                                                                                                                                                                                                                                                                                                                                                                                                        |
|                           | <a href="http://www.elsa-project.ac.uk/publicationDetails/id/7167">http://www.elsa-project.ac.uk/publicationDetails/id/7167</a>                                                                                                                                |                                                      |                                                 |                                                                                                                                                                                                                                                                                                                                                                                                                                                                                                                                                                                                                                                                                                                                                                                                        |

| Required Field (please X) | Variable                     | Variable Label   | Values   | Value Label                        | comment |  |  |
|---------------------------|------------------------------|------------------|----------|------------------------------------|---------|--|--|
|                           | Sleep                        | Have you slept   | 1        | Yes                                |         |  |  |
|                           |                              |                  | 2        | No                                 |         |  |  |
|                           |                              |                  | 3        | Not sure                           |         |  |  |
|                           |                              |                  | 97/98/99 | Missing                            |         |  |  |
|                           | HealthRelatedMobility        | EQ5D             | 1        | no problems walking about          |         |  |  |
|                           |                              |                  | 2        | slight problems                    |         |  |  |
|                           |                              |                  | 3        | moderate problems                  |         |  |  |
|                           |                              |                  | 4        | severe problems                    |         |  |  |
|                           |                              |                  | 5        | unable to walk                     |         |  |  |
|                           |                              |                  | 97/98/99 | Missing                            |         |  |  |
|                           | HealthRelatedSelfCare        |                  | 1        | no problems washing or dressing    |         |  |  |
|                           |                              |                  | 2        | slight problems                    |         |  |  |
|                           |                              |                  | 3        | moderate problems                  |         |  |  |
|                           |                              |                  | 4        | severe problems                    |         |  |  |
|                           |                              |                  | 5        | unable to wash or dress            |         |  |  |
|                           |                              |                  | 97/98/99 | Missing                            |         |  |  |
|                           | HealthRelatedUsualActivities |                  | 1        | no problems doing usual activities |         |  |  |
|                           |                              |                  | 2        | slight problems                    |         |  |  |
|                           |                              |                  | 3        | moderate problems                  |         |  |  |
|                           |                              |                  | 4        | severe problems                    |         |  |  |
|                           |                              |                  | 5        | unable to do usual activities      |         |  |  |
|                           |                              |                  | 97/98/99 | Missing                            |         |  |  |
|                           | HealthRelatedPain            |                  | 1        | no pain or discomfort              |         |  |  |
|                           |                              |                  | 2        | slight pain or discomfort          |         |  |  |
|                           |                              |                  | 3        | moderate pain or discomfort        |         |  |  |
|                           |                              |                  | 4        | severe pain or discomfort          |         |  |  |
|                           |                              |                  | 5        | extreme pain or discomfort         |         |  |  |
|                           |                              |                  | 97/98/99 | Missing                            |         |  |  |
|                           | HealthRelatedAnxiety         |                  | 1        | not anxious or depressed           |         |  |  |
|                           |                              |                  | 2        | slightly anxious or depressed      |         |  |  |
|                           |                              |                  | 3        | moderately anxious or depressed    |         |  |  |
|                           |                              |                  | 4        | severely anxious or depressed      |         |  |  |
|                           |                              |                  | 5        | extremely anxious or depressed     |         |  |  |
|                           |                              |                  | 97/98/99 | Missing                            |         |  |  |
|                           | CALC_EQ5D5L                  | total EQ5D score |          |                                    |         |  |  |

[illegible]

| Required Field (please X) |                                        |                                                                                    |             |                      |  |                  |
|---------------------------|----------------------------------------|------------------------------------------------------------------------------------|-------------|----------------------|--|------------------|
|                           | Variable                               | Variable Label                                                                     | Values      | Value Label comment  |  |                  |
|                           | SomeoneToTalkTo_LoninessScale          | ...the extent to which the statements apply                                        | 1           | yes                  |  |                  |
|                           | MissHavingCloseFriend_LoninessScale    |                                                                                    | 2           | more or less         |  |                  |
|                           | SenseOfEmptiness_LoninessScale         |                                                                                    | 3           | no                   |  |                  |
|                           | PeopleICanLeanOn_LoninessScale         |                                                                                    | 97/98/99    | missing              |  |                  |
|                           | MissCompanyOfOthers_LoninessScale      |                                                                                    |             |                      |  |                  |
|                           | CircleOfFriendsLimited_LoninessScale   |                                                                                    |             |                      |  |                  |
|                           | PeopleITrustCompletely_LoninessScale   |                                                                                    |             |                      |  |                  |
|                           | PeopleIFeelCloseTo_LoninessScale       |                                                                                    |             |                      |  |                  |
|                           | MissHavingPeopleAround_LoninessScale   |                                                                                    |             |                      |  |                  |
|                           | FeelRejected_LoninessScale             |                                                                                    |             |                      |  |                  |
|                           | CallFriendsWheneverINeed_LoninessScale |                                                                                    |             |                      |  |                  |
|                           |                                        |                                                                                    |             |                      |  |                  |
|                           | CALC_emotionalLoneliness               | yes or more or less on ? 2,3,5,6,9,10                                              | number      |                      |  |                  |
|                           |                                        |                                                                                    |             |                      |  |                  |
|                           | CALC_missingemotionalLoneliness        | number of mising items                                                             |             |                      |  |                  |
|                           |                                        |                                                                                    |             |                      |  |                  |
|                           | CALC_socialLoneliness                  | no or more or less on ?1,4,7,8,11                                                  |             |                      |  |                  |
|                           |                                        |                                                                                    |             |                      |  |                  |
|                           | CALC_misssingsocialLoneliness          | number of missing items                                                            |             |                      |  |                  |
|                           |                                        |                                                                                    |             |                      |  |                  |
|                           | CALC_totalLonliness                    | De Jong Gierveld scale sum of emotional and social loneliness                      | 0-2         | not lonely           |  |                  |
|                           |                                        |                                                                                    | 3-8         | moderately lonely    |  |                  |
|                           |                                        |                                                                                    | 9-10        | severely lonely      |  |                  |
|                           |                                        |                                                                                    | 11          | very serverly lonely |  |                  |
|                           |                                        |                                                                                    | 97/98/99    | Missing              |  |                  |
|                           |                                        |                                                                                    |             |                      |  |                  |
|                           | CALC_LonelinessScore                   | loneliness category                                                                | 1           | Not lonely           |  |                  |
|                           |                                        |                                                                                    | 2           | Moderately lonely    |  |                  |
|                           |                                        |                                                                                    | 3           | Severely lonely      |  |                  |
|                           |                                        |                                                                                    | 4           | Very severely lonely |  |                  |
|                           |                                        |                                                                                    | 97/98/99    | Missing              |  |                  |
|                           |                                        |                                                                                    |             |                      |  |                  |
| 1                         | SatisfiedWithLife                      | basically satisfied with life                                                      | 0           | yes                  |  | 1 yes            |
| 2                         | DroppedActivities                      | dropped many activities and interests                                              | 1           | no                   |  | 0 no             |
| 3                         | FeelEmpty                              | feel life is empty                                                                 | 97/98/99    | Missing              |  | 97/98/99 Missing |
| 4                         | GetBored                               | often get bored                                                                    |             |                      |  |                  |
| 5                         | GetBored2 -?goodspirits?               | in good spirits most of the time                                                   |             |                      |  |                  |
| 6                         | SomethingBadGoingToHappen              | afraid that something bad is going to happen                                       |             |                      |  |                  |
| 7                         | FeelHappy                              | feel happy most of the time                                                        |             |                      |  |                  |
| 8                         | FeelHelpless                           | often feel helpless                                                                |             |                      |  |                  |
| 9                         | PreferToStayAtHome                     | prefer to stay at home rather than going out and doing things                      |             |                      |  |                  |
| 10                        | ProblemsWithMemory                     | more problems with memory than most                                                |             |                      |  |                  |
| 11                        | WonderfulToBeAlive                     | think it's wonderful to be alive                                                   |             |                      |  |                  |
| 12                        | Worthless                              | worthless the way you are now                                                      |             |                      |  |                  |
| 13                        | FullOfEnergy                           | full of energy                                                                     |             |                      |  |                  |
| 14                        | SituationIsHopeless                    | situation is hopeless                                                              |             |                      |  |                  |
| 15                        | BetterOffThanYou                       | most people better off than you                                                    |             |                      |  |                  |
|                           |                                        |                                                                                    |             |                      |  |                  |
|                           | GeriatricDepressionScale               | total from 15 questions reverse score for items 1,5,7,11,13 >=5 suggests depressed | number 0-15 |                      |  |                  |
|                           |                                        |                                                                                    | 97/98/99    | Missing              |  |                  |
|                           |                                        |                                                                                    |             |                      |  |                  |

| Required<br>Field (please<br>X) | Variable                                            | Variable Label                 | Values                          | Value Label       | comment |
|---------------------------------|-----------------------------------------------------|--------------------------------|---------------------------------|-------------------|---------|
|                                 | BounceBackQuickly_BriefResilienceScale              | agreement with resilience      | 1                               | strongly agree    |         |
|                                 | HardTimeThroughStressfulEvents_BriefResilienceScale |                                | 2                               | agree             |         |
|                                 | LongToRecoverFromStress_BriefResilienceScale        |                                | 3                               | neutral           |         |
|                                 | SnapBackFromSomethingBad_BriefResilienceScale       |                                | 4                               | disagree          |         |
|                                 | DifficultTimesLittleTrouble_BriefResilienceScale    |                                | 5                               | strongly disagree |         |
|                                 | TimeToGetOverSetBacks_BriefResilienceScale          |                                | 97/98/99                        | Missing           |         |
|                                 |                                                     |                                |                                 |                   |         |
|                                 | CALC_briefResilienceScale                           | sum/6 items reverse scorin     | number 1-6 higer=more resilient |                   |         |
|                                 |                                                     |                                | 97/98/99                        | Missing           |         |
|                                 |                                                     |                                |                                 |                   |         |
|                                 | SolveDifficultProblems_SelfEfficacyScale            | agreement with general se      | 1                               | not at all true   |         |
|                                 | WaysToGetWhatIWant_SelfEfficacyScale                |                                | 2                               | hardly true       |         |
|                                 | AccomplishMyGoals_SelfEfficacyScale                 |                                | 3                               | moderately true   |         |
|                                 | DealWithUnexpectedEvents_SelfEfficacyScale          |                                | 4                               | exactly true      |         |
|                                 | HandleUnforeseenSituations_SelfEfficacyScale        |                                | 97/98/99                        | Missing           |         |
|                                 | SolveMostProblems_SelfEfficacyScale                 |                                |                                 |                   |         |
|                                 | RemainCalm_SelfEfficacyScale                        |                                |                                 |                   |         |
|                                 | FindSeveralSolutions_SelfEfficacyScale              |                                |                                 |                   |         |
|                                 | ThinkOfASolution_SelfEfficacyScale                  |                                |                                 |                   |         |
|                                 | HandleWhateverComes_SelfEfficacyScale               |                                |                                 |                   |         |
|                                 |                                                     |                                |                                 |                   |         |
|                                 | CALC_SelfEfficacyScale                              | Total self-efficacy score- hig | number 10-40                    |                   |         |
|                                 |                                                     |                                | 97/98/99                        | Missing           |         |

|                                                                |  |  |  |  |
|----------------------------------------------------------------|--|--|--|--|
| NB: Individual items in ELSA are pulled from other assessments |  |  |  |  |
|                                                                |  |  |  |  |
| WalkingOneBlock_SF-36Activities                                |  |  |  |  |
| SitUprightForTwoHours                                          |  |  |  |  |
| AbleToGetUpFromChair                                           |  |  |  |  |
| ClimbingSeveralStairs_SF-36Activities                          |  |  |  |  |
| ClimbingStairs_SF-36Activities                                 |  |  |  |  |
| BendingKneelingStooping_SF-36Activities                        |  |  |  |  |
| PenFromHand                                                    |  |  |  |  |
| ModerateActivities_SF-36Activities                             |  |  |  |  |
| VigorousActivities_SF-36Activities                             |  |  |  |  |
| CoinFromTable                                                  |  |  |  |  |
| HealthRelatedSelfCare                                          |  |  |  |  |
| HealthRelatedMobility                                          |  |  |  |  |
| Bathing                                                        |  |  |  |  |
| Feeding                                                        |  |  |  |  |
| Transfers                                                      |  |  |  |  |
| ToiletUse                                                      |  |  |  |  |
| BustrainTimetable                                              |  |  |  |  |
| MakeYourslefAHotSnack                                          |  |  |  |  |
| DoOwnShopping_NEADLPartTwo                                     |  |  |  |  |
| UseTelephone_NEADLPartTwo                                      |  |  |  |  |
| EFSForgetMedication                                            |  |  |  |  |
| ManageOwnMoney_NEADLPartTwo                                    |  |  |  |  |
| DoOwnHousework_NEADLPartTwo                                    |  |  |  |  |
| ExhaustionPartA                                                |  |  |  |  |
| Sleep                                                          |  |  |  |  |
| GoodSpirits                                                    |  |  |  |  |
| WonderfulToBeAlive                                             |  |  |  |  |
| FeelHappy                                                      |  |  |  |  |
| ExhaustionPartB                                                |  |  |  |  |
| Hypertension                                                   |  |  |  |  |
| Atherosclerotic                                                |  |  |  |  |
| MyocardialInfarction                                           |  |  |  |  |
| HeartFailure                                                   |  |  |  |  |
| DiabetesMellitus                                               |  |  |  |  |
| Cerebrovascular                                                |  |  |  |  |
| COPD                                                           |  |  |  |  |
| RespiratoryAsthma                                              |  |  |  |  |
| Osteoporosis                                                   |  |  |  |  |
| ExcludingNonmelanoma                                           |  |  |  |  |
| Parkinson                                                      |  |  |  |  |
| NeurologicalDementia                                           |  |  |  |  |
| eyesight 4 & 5                                                 |  |  |  |  |
| hearing & vision 6 & 7                                         |  |  |  |  |
| FallsInLast12Months                                            |  |  |  |  |
| FracturedHipWristBackbone                                      |  |  |  |  |
| Joint                                                          |  |  |  |  |
| geriatric pain measure 3 or                                    |  |  |  |  |
| MoCAOrientationDate                                            |  |  |  |  |
| MoCAOrientationMonth                                           |  |  |  |  |
| MoCAOrientationYear                                            |  |  |  |  |
| MoCAOrientationDay                                             |  |  |  |  |
| MoCASentenceRepetitionOne                                      |  |  |  |  |
| MoCAVerbalFluency                                              |  |  |  |  |
| delayed recall combines 5 questions                            |  |  |  |  |
| SF-36HealthSurvey'                                             |  |  |  |  |
| GeriatricDepressionScale >= 5                                  |  |  |  |  |
| CALC_totalLonliness) >= 3                                      |  |  |  |  |
| AtrialFibrillation                                             |  |  |  |  |
| AtrialFlutter                                                  |  |  |  |  |
| Osteoarthritis                                                 |  |  |  |  |
| RheumatoidArthritis                                            |  |  |  |  |
| OtherArthritis                                                 |  |  |  |  |
| Arthritis                                                      |  |  |  |  |
| Anxiety                                                        |  |  |  |  |
| Depression                                                     |  |  |  |  |
| RecognisingPeople                                              |  |  |  |  |
| ReadingNewsprint                                               |  |  |  |  |
| HearingInQuietRoom                                             |  |  |  |  |
| HearingInLoudRoom                                              |  |  |  |  |
| PainStoppedWalkingMoreThan200                                  |  |  |  |  |
| PainStoppedWalkingLessThan200                                  |  |  |  |  |
| MoCADelayedRecallFace                                          |  |  |  |  |
| MoCADelayedRecallVelvet                                        |  |  |  |  |
| MoCADelayedRecallChurch                                        |  |  |  |  |
| MoCADelayedRecallDaisy                                         |  |  |  |  |
| MoCADelayedRecallRed                                           |  |  |  |  |
|                                                                |  |  |  |  |
| CALC_ELSAFrailtyIndex                                          |  |  |  |  |

|                                                                                                                           |  |  |  |  |  |  |  |  |
|---------------------------------------------------------------------------------------------------------------------------|--|--|--|--|--|--|--|--|
| NB: Individual items in Fried are pulled from other assessment data where possible to avoid overburdening the participant |  |  |  |  |  |  |  |  |
|                                                                                                                           |  |  |  |  |  |  |  |  |
| CALC_DemiSpanHeight                                                                                                       |  |  |  |  |  |  |  |  |
| CALC_BMI                                                                                                                  |  |  |  |  |  |  |  |  |
| WalkTime                                                                                                                  |  |  |  |  |  |  |  |  |
| WeightLoss                                                                                                                |  |  |  |  |  |  |  |  |
| ExhaustionPartA                                                                                                           |  |  |  |  |  |  |  |  |
| ExhaustionPartB                                                                                                           |  |  |  |  |  |  |  |  |
| DominantHand                                                                                                              |  |  |  |  |  |  |  |  |
| DominantHandFirstAttempt                                                                                                  |  |  |  |  |  |  |  |  |
| DominantHandSecondAttempt                                                                                                 |  |  |  |  |  |  |  |  |
| DominantHandThirdAttempt                                                                                                  |  |  |  |  |  |  |  |  |
| NonDominantHandFirstAttempt                                                                                               |  |  |  |  |  |  |  |  |
| NonDominantHandSecondAttempt                                                                                              |  |  |  |  |  |  |  |  |
| NonDominantHandThirdAttempt                                                                                               |  |  |  |  |  |  |  |  |
| CALC_DominantMeanGripStrength                                                                                             |  |  |  |  |  |  |  |  |
| CALC_NonDominantMeanGripStrength                                                                                          |  |  |  |  |  |  |  |  |
| CALC_FriedTotalScore                                                                                                      |  |  |  |  |  |  |  |  |
